# Supplementary material for: Taming salophen in rare earth metallocene chemistry
Source: Royal Society of Chemistry journal article supplement (doi:10.1039/d1qi01331a), 2022-01-01
Supplement: d1qi01331a1.pdf [file d1qi01331a1.pdf]

Supplementary Information

# **Taming salophen in rare earth metallocene chemistry**

Ernesto Castellanos, Florian Benner, and Selvan Demir\*

Department of Chemistry, Michigan State University, 578 South Shaw Lane, East Lansing, Michigan 48824, USA

\*Correspondence to: [sdemir@chemistry.msu.edu](mailto:sdemir@chemistry.msu.edu) (S.D.)

*Inorg. Chem. Front.*

## Table of Contents

|          |                                                                                                                                                                                                                                                                      |            |
|----------|----------------------------------------------------------------------------------------------------------------------------------------------------------------------------------------------------------------------------------------------------------------------|------------|
| <b>1</b> | <b>X-Ray Crystallography.</b>                                                                                                                                                                                                                                        | <b>S4</b>  |
|          | <b>Table S1.</b> Crystallographic Data and Structural Refinements of $(\text{Cp}^*_2\text{RE})_2(\mu\text{-}^t\text{Bu}\text{salophen})\cdot 3\text{tol}$ , RE = Gd ( <b>1</b> ), Dy ( <b>2</b> ), and Y ( <b>3</b> ).                                               | S4         |
|          | <b>Fig. S1.</b> Structure of $(\text{Cp}^*_2\text{Gd})_2(\mu\text{-}^t\text{Bu}\text{salophen})$ , <b>1</b> .                                                                                                                                                        | S5         |
|          | <b>Fig. S2.</b> Structure of $(\text{Cp}^*_2\text{Dy})_2(\mu\text{-}^t\text{Bu}\text{salophen})$ , <b>2</b> .                                                                                                                                                        | S6         |
|          | <b>Fig. S3.</b> Structure of $(\text{Cp}^*_2\text{Y})_2(\mu\text{-}^t\text{Bu}\text{salophen})$ , <b>3</b> .                                                                                                                                                         | S7         |
| <b>2</b> | <b>NMR Spectroscopy.</b>                                                                                                                                                                                                                                             | <b>S8</b>  |
|          | <b>Fig. S4.</b> $^1\text{H}$ NMR spectra of $\text{H}_2\text{-}^t\text{Bu}\text{salophen}$ and $\text{K}_2\text{-}^t\text{Bu}\text{salophen}$ .                                                                                                                      | S8         |
|          | <b>Fig. S5.</b> $^1\text{H}$ NMR spectrum of $(\text{Cp}^*_2\text{Gd})_2(\mu\text{-}^t\text{Bu}\text{salophen})$ , <b>1</b> .                                                                                                                                        | S9         |
|          | <b>Fig. S6.</b> $^1\text{H}$ NMR spectrum of $(\text{Cp}^*_2\text{Dy})_2(\mu\text{-}^t\text{Bu}\text{salophen})$ , <b>2</b> .                                                                                                                                        | S9         |
|          | <b>Fig. S7.</b> $^1\text{H}$ NMR spectrum of $(\text{Cp}^*_2\text{Y})_2(\mu\text{-}^t\text{Bu}\text{salophen})$ , <b>3</b> .                                                                                                                                         | S10        |
|          | <b>Fig. S8.</b> $^1\text{H}$ - $^1\text{H}$ COSY spectrum of $(\text{Cp}^*_2\text{Y})_2(\mu\text{-}^t\text{Bu}\text{salophen})$ , <b>3</b> .                                                                                                                         | S11        |
|          | <b>Fig. S9.</b> Enlarged $^1\text{H}$ - $^1\text{H}$ COSY spectrum of $(\text{Cp}^*_2\text{Y})_2(\mu\text{-}^t\text{Bu}\text{salophen})$ , <b>3</b> .                                                                                                                | S11        |
|          | <b>Fig. S10.</b> $^{13}\text{C}$ NMR spectrum of $(\text{Cp}^*_2\text{Y})_2(\mu\text{-}^t\text{Bu}\text{salophen})$ , <b>3</b> .                                                                                                                                     | S12        |
|          | <b>Fig. S11.</b> $^1\text{H}$ - $^{13}\text{C}$ HSQC spectrum of $(\text{Cp}^*_2\text{Y})_2(\mu\text{-}^t\text{Bu}\text{salophen})$ , <b>3</b> .                                                                                                                     | S13        |
|          | <b>Fig. S12.</b> $^1\text{H}$ - $^{13}\text{C}$ HMBC spectrum of $(\text{Cp}^*_2\text{Y})_2(\mu\text{-}^t\text{Bu}\text{salophen})$ , <b>3</b> .                                                                                                                     | S14        |
|          | <b>Fig. S13.</b> Enlarged $^1\text{H}$ - $^{13}\text{C}$ HMBC spectrum of $(\text{Cp}^*_2\text{Y})_2(\mu\text{-}^t\text{Bu}\text{salophen})$ , <b>3</b> .                                                                                                            | S14        |
|          | <b>Fig. S14.</b> $^{89}\text{Y}$ NMR spectrum of $(\text{Cp}^*_2\text{Y})_2(\mu\text{-}^t\text{Bu}\text{salophen})$ , <b>3</b> .                                                                                                                                     | S15        |
|          | <b>Fig. S15.</b> $^{89}\text{Y}$ NMR spectrum of $(\text{Cp}^*_2\text{Y})_2(\mu\text{-}^t\text{Bu}\text{salophen})$ , <b>3</b> , referenced to a 3 M solution of $\text{YCl}_3$ in $\text{D}_2\text{O}$ .                                                            | S15        |
|          | <b>Fig. S16.</b> Proton-decoupled $^{89}\text{Y}$ NMR ( $^{89}\text{Y}\text{-}\{^1\text{H}\}$ ) spectrum of $(\text{Cp}^*_2\text{Y})_2(\mu\text{-}^t\text{Bu}\text{salophen})$ , <b>3</b> , referenced to a 3 M solution of $\text{YCl}_3$ in $\text{D}_2\text{O}$ . | S16        |
| <b>3</b> | <b>IR Spectroscopy.</b>                                                                                                                                                                                                                                              | <b>S17</b> |
|          | <b>Fig. S17.</b> FTIR spectrum of $(\text{Cp}^*_2\text{Gd})_2(\mu\text{-}^t\text{Bu}\text{salophen})$ , <b>1</b> .                                                                                                                                                   | S17        |
|          | <b>Fig. S18.</b> FTIR spectrum of $(\text{Cp}^*_2\text{Dy})_2(\mu\text{-}^t\text{Bu}\text{salophen})$ , <b>2</b> .                                                                                                                                                   | S17        |
|          | <b>Fig. S19.</b> FTIR spectrum of $(\text{Cp}^*_2\text{Y})_2(\mu\text{-}^t\text{Bu}\text{salophen})$ , <b>3</b> .                                                                                                                                                    | S18        |

|          |                                                                                                                                                                                                                 |            |
|----------|-----------------------------------------------------------------------------------------------------------------------------------------------------------------------------------------------------------------|------------|
| <b>4</b> | <b>Magnetic Measurements.</b>                                                                                                                                                                                   | <b>S19</b> |
|          | <b>Fig. S20.</b> Plots of $\chi_M T$ vs. $T$ for $(\text{Cp}^*_2\text{Gd})_2(\mu\text{-}^t\text{Bu}\text{salophen})$ , <b>1</b> , between 2 and 300 K.                                                          | S19        |
|          | <b>Fig. S21.</b> Plots of $\chi_M T$ vs. $T$ for $(\text{Cp}^*_2\text{Dy})_2(\mu\text{-}^t\text{Bu}\text{salophen})$ , <b>2</b> , between 2 and 300 K.                                                          | S19        |
|          | <b>Table S2.</b> Magnetic exchange coupling constant, $J$ , $g$ values, and residuals from fitting $\chi_M T$ vs. $T$ for <b>1</b> .                                                                            | S20        |
|          | <b>Fig. S22.</b> Field-dependent magnetization and reduced magnetization data for $(\text{Cp}^*_2\text{Gd})_2(\mu\text{-}^t\text{Bu}\text{salophen})$ , <b>1</b> .                                              | S20        |
|          | <b>Fig. S23.</b> Field-dependent magnetization and reduced magnetization data for $(\text{Cp}^*_2\text{Dy})_2(\mu\text{-}^t\text{Bu}\text{salophen})$ , <b>2</b> .                                              | S21        |
|          | <b>Fig. S24.</b> Ac field scan for $(\text{Cp}^*_2\text{Dy})_2(\mu\text{-}^t\text{Bu}\text{salophen})$ , <b>2</b> , at 2 K.                                                                                     | S21        |
|          | <b>Fig. S25.</b> Cole-Cole plots for ac magnetic susceptibility collected from 1.8 to 4.2 K under 1000 Oe applied dc field for $(\text{Cp}^*_2\text{Dy})_2(\mu\text{-}^t\text{Bu}\text{salophen})$ , <b>2</b> . | S22        |
|          | <b>Fig. S26.</b> Arrhenius plots of relaxation times data for $(\text{Cp}^*_2\text{Dy})_2(\mu\text{-}^t\text{Bu}\text{salophen})$ , <b>2</b> .                                                                  | S23        |
|          | <b>Fig. S27.</b> Variable-field magnetization (M) data for $(\text{Cp}^*_2\text{Dy})_2(\mu\text{-}^t\text{Bu}\text{salophen})$ , <b>2</b> .                                                                     | S24        |
|          | <b>Table S3.</b> Selected multinuclear Gd and Dy complexes containing diamagnetic bridging ligands.                                                                                                             | S25        |
| <b>5</b> | <b>Cyclic Voltammetry.</b>                                                                                                                                                                                      | <b>S26</b> |
|          | <b>Fig S28.</b> Cyclic voltammograms of $(\text{Cp}^*_2\text{RE})_2(\mu\text{-}^t\text{Bu}\text{salophen})$ , where RE = Gd ( <b>1</b> ), Dy ( <b>2</b> ), and Y ( <b>3</b> ).                                  | S26        |
| <b>6</b> | <b>EPR Spectroscopy.</b>                                                                                                                                                                                        | <b>S27</b> |
|          | <b>Fig. S29.</b> Frozen solution X-band EPR spectrum of $(\text{Cp}^*_2\text{Gd})_2(\mu\text{-}^t\text{Bu}\text{salophen})$ , <b>1</b> .                                                                        | S27        |
| <b>7</b> | <b>DFT Calculations.</b>                                                                                                                                                                                        | <b>S28</b> |
|          | <b>Table S4.</b> Metrical parameters for $(\text{Cp}^*_2\text{Y})_2(\mu\text{-}^t\text{Bu}\text{salophen})$ , <b>3</b> , calculated as a neutral singlet using the B3LYP functional.                            | S28        |
|          | <b>Table S5.</b> Metrical parameters for $(\text{Cp}^*_2\text{Y})_2(\mu\text{-}^t\text{Bu}\text{salophen})$ , <b>3</b> , calculated as a neutral singlet using the hybrid TPSSh functional.                     | S29        |
|          | <b>Table S6.</b> Metrical parameters for $(\text{Cp}^*_2\text{Y})_2(\mu\text{-}^t\text{Bu}\text{salophen})$ , <b>3</b> , calculated as a neutral singlet using the TPSSTPSS functional.                         | S30        |
| <b>8</b> | <b>References.</b>                                                                                                                                                                                              | <b>S31</b> |

# 1 X-Ray Crystallography

**Table S1.** Crystallographic Data and Structural Refinements of (Cp\*<sub>2</sub>RE)<sub>2</sub>(μ-<sup>t</sup>Bu salophen)•3tol, where RE = Gd (1), Dy (2), and Y (3).

|                                                       | <b>Gd (1)</b>                                                                  | <b>Dy (2)</b>                                                                  | <b>Y (3)</b>                                                                  |
|-------------------------------------------------------|--------------------------------------------------------------------------------|--------------------------------------------------------------------------------|-------------------------------------------------------------------------------|
| <b>Empirical formula</b>                              | C <sub>97</sub> H <sub>130</sub> Gd <sub>2</sub> N <sub>2</sub> O <sub>2</sub> | C <sub>97</sub> H <sub>130</sub> Dy <sub>2</sub> N <sub>2</sub> O <sub>2</sub> | C <sub>97</sub> H <sub>130</sub> N <sub>2</sub> O <sub>2</sub> Y <sub>2</sub> |
| <b>Formula weight</b>                                 | 1670.52                                                                        | 1681.02                                                                        | 1533.84                                                                       |
| <b>Temperature/K</b>                                  | 100.00(10)                                                                     | 100.00(10)                                                                     | 100.00(10)                                                                    |
| <b>Crystal system</b>                                 | Triclinic                                                                      | triclinic                                                                      | triclinic                                                                     |
| <b>Space group</b>                                    | P-1                                                                            | P-1                                                                            | P-1                                                                           |
| <b>a/Å</b>                                            | 13.29159(18)                                                                   | 13.30200(10)                                                                   | 13.2958(2)                                                                    |
| <b>b/Å</b>                                            | 17.9159(3)                                                                     | 17.8838(2)                                                                     | 17.8857(3)                                                                    |
| <b>c/Å</b>                                            | 18.6270(3)                                                                     | 18.6222(2)                                                                     | 18.6124(3)                                                                    |
| <b>α/°</b>                                            | 74.8284(11)                                                                    | 74.7980(10)                                                                    | 74.7606(14)                                                                   |
| <b>β/°</b>                                            | 84.4183(11)                                                                    | 84.3290(10)                                                                    | 84.4318(15)                                                                   |
| <b>γ/°</b>                                            | 87.0897(10)                                                                    | 87.2430(10)                                                                    | 87.1630(14)                                                                   |
| <b>Volume/Å<sup>3</sup></b>                           | 4259.29(12)                                                                    | 4252.96(8)                                                                     | 4249.00(12)                                                                   |
| <b>Z</b>                                              | 2                                                                              | 2                                                                              | 2                                                                             |
| <b>ρ<sub>calc</sub> g/cm<sup>3</sup></b>              | 1.303                                                                          | 1.313                                                                          | 1.199                                                                         |
| <b>μ/mm<sup>-1</sup></b>                              | 1.592                                                                          | 9.648                                                                          | 1.407                                                                         |
| <b>F(000)</b>                                         | 1740.0                                                                         | 1748.0                                                                         | 1640.0                                                                        |
| <b>Crystal size/mm<sup>3</sup></b>                    | 0.118 × 0.091 ×<br>0.07                                                        | 0.258 × 0.147 ×<br>0.134                                                       | 0.456 × 0.389 ×<br>0.266                                                      |
| <b>Radiation</b>                                      | Mo K <sub>α</sub> (λ =<br>0.71073)                                             | Cu K <sub>α</sub> (λ =<br>1.54184)                                             | Mo K <sub>α</sub> (λ =<br>0.71073)                                            |
| <b>2θ range for data collection/°</b>                 | 4.364 to 62.412                                                                | 4.938 to 154.584                                                               | 4.552 to 58.106                                                               |
| <b>Index ranges</b>                                   | -18 ≤ h ≤ 16, -23 ≤<br>k ≤ 22, -24 ≤ l ≤ 23                                    | -16 ≤ h ≤ 16, -19 ≤<br>k ≤ 22, -22 ≤ l ≤ 23                                    | -16 ≤ h ≤ 17, -24 ≤<br>k ≤ 23, -25 ≤ l ≤ 24                                   |
| <b>Reflections collected</b>                          | 74383                                                                          | 108689                                                                         | 62261                                                                         |
| <b>Independent reflections</b>                        | 21857 [R <sub>int</sub> =<br>0.0497, R <sub>σ</sub> =<br>0.0491]               | 17571 [R <sub>int</sub> =<br>0.0564, R <sub>σ</sub> =<br>0.0325]               | 19985 [R <sub>int</sub> =<br>0.0275, R <sub>σ</sub> =<br>0.0348]              |
| <b>Data/restraints/parameters</b>                     | 21857/0/962                                                                    | 17571/0/962                                                                    | 19985/0/962                                                                   |
| <b>Goodness-of-fit on F<sup>2</sup></b>               | 1.034                                                                          | 1.061                                                                          | 1.039                                                                         |
| <b>Final R indexes [I &gt; 2σ (I)]</b>                | R <sub>1</sub> = 0.0357,<br>wR <sub>2</sub> = 0.0823                           | R <sub>1</sub> = 0.0607,<br>wR <sub>2</sub> = 0.1671                           | R <sub>1</sub> = 0.0450,<br>wR <sub>2</sub> = 0.1043                          |
| <b>Final R indexes [all data]</b>                     | R <sub>1</sub> = 0.0483,<br>wR <sub>2</sub> = 0.0874                           | R <sub>1</sub> = 0.0642,<br>wR <sub>2</sub> = 0.1692                           | R <sub>1</sub> = 0.0565,<br>wR <sub>2</sub> = 0.1084                          |
| <b>Largest diff. peak/hole / e<br/>Å<sup>-3</sup></b> | 2.46/-0.77                                                                     | 3.54/-1.90                                                                     | 1.04/-0.41                                                                    |

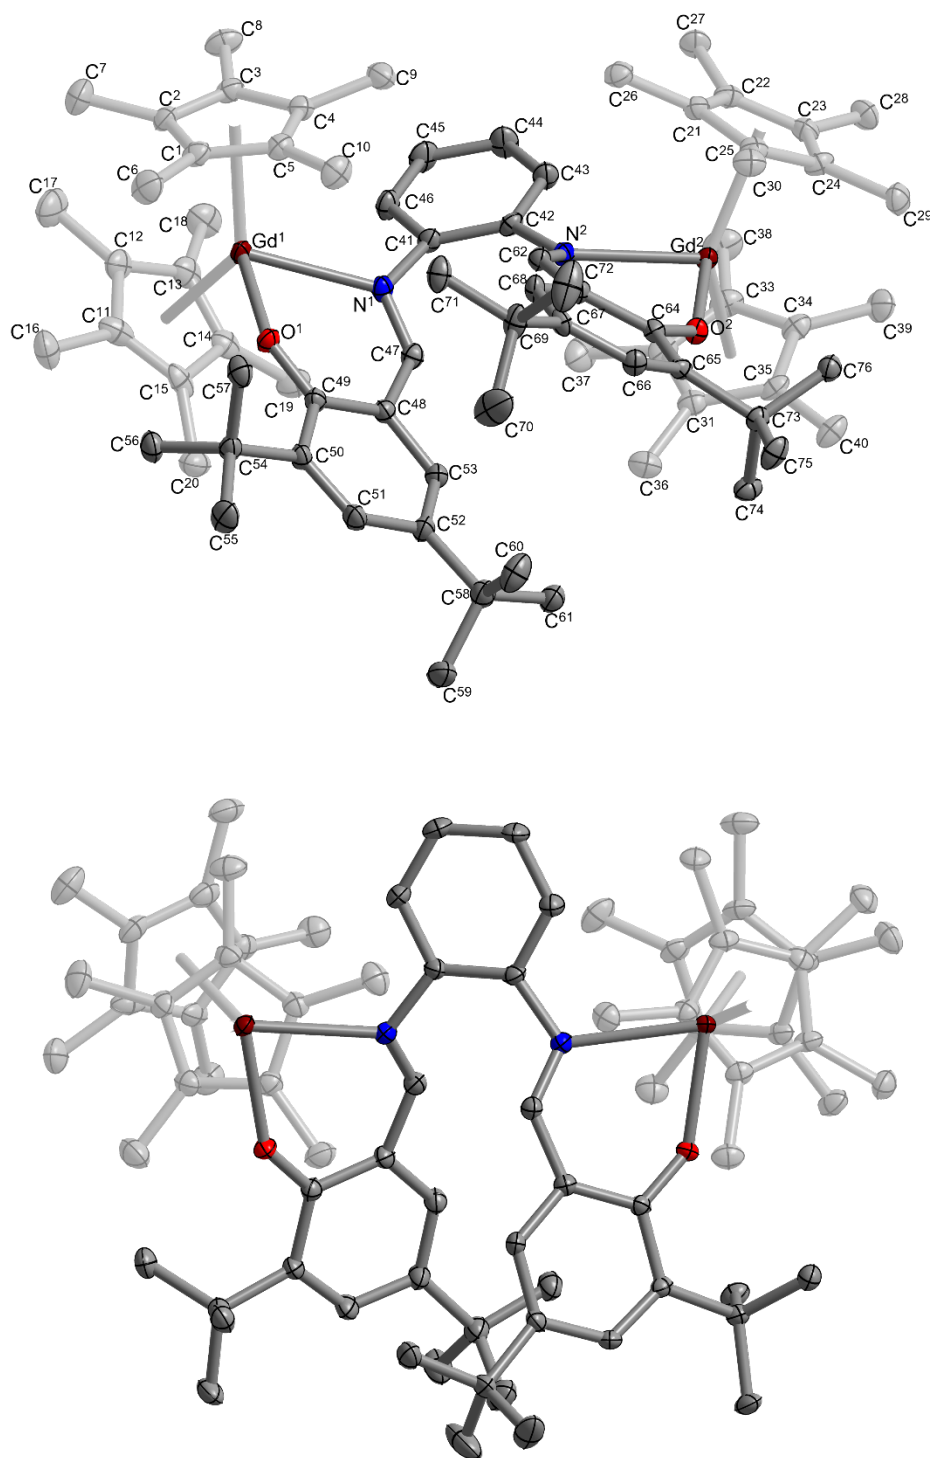

**Fig. S1.** Structure of  $(\text{Cp}^*_2\text{Gd})_2(\mu\text{-}^t\text{Bu-salophen})$ , **1**, with thermal ellipsoids drawn at 50% probability level. (Top) Front perspective of **1**, with corresponding atom labels. (Bottom) Top perspective of **1**. Maroon, red, blue, and grey ellipsoids represent Gd, O, N, and C atoms, respectively.  $(\text{Cp}^*)^-$  ligands have been faded for clarity. Hydrogen atoms, and solvent molecules in the crystal lattice, have been omitted for clarity.

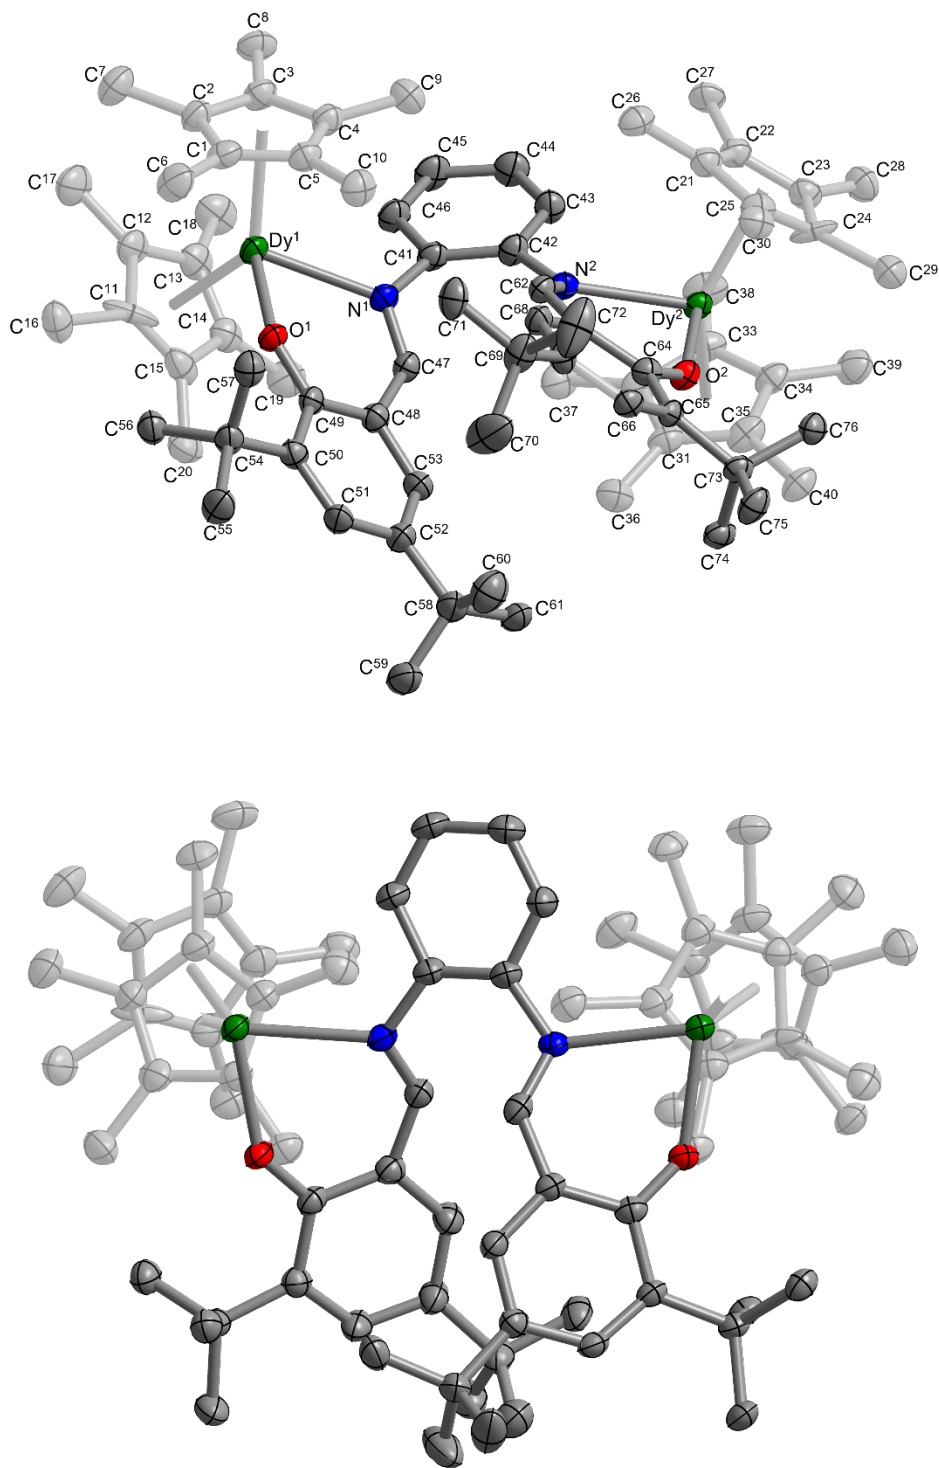

**Fig. S2.** Structure of  $(\text{Cp}^*_2\text{Dy})_2(\mu\text{-}^i\text{Bu}\text{salophen})$ , **2**, with thermal ellipsoids drawn at 50% probability level. (Top) Top perspective of **2**, with corresponding atom labels. (Bottom) Front perspective of **2**. Green, red, blue, and grey ellipsoids represent Dy, O, N, and C atoms, respectively.  $(\text{Cp}^*)^-$  ligands have been faded for clarity. Hydrogen atoms, and solvent molecules in the crystal lattice, have been omitted for clarity.

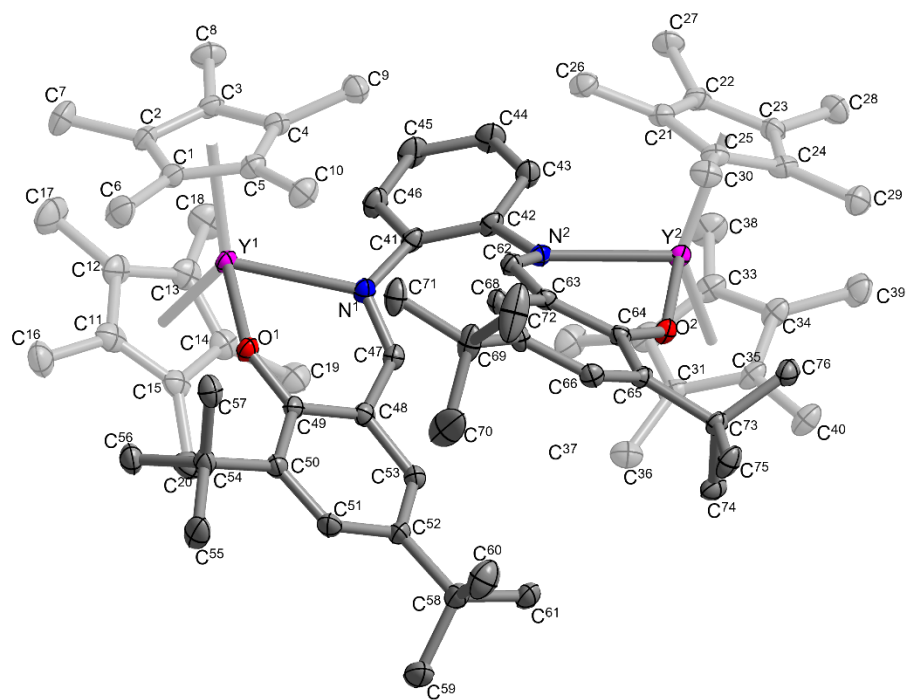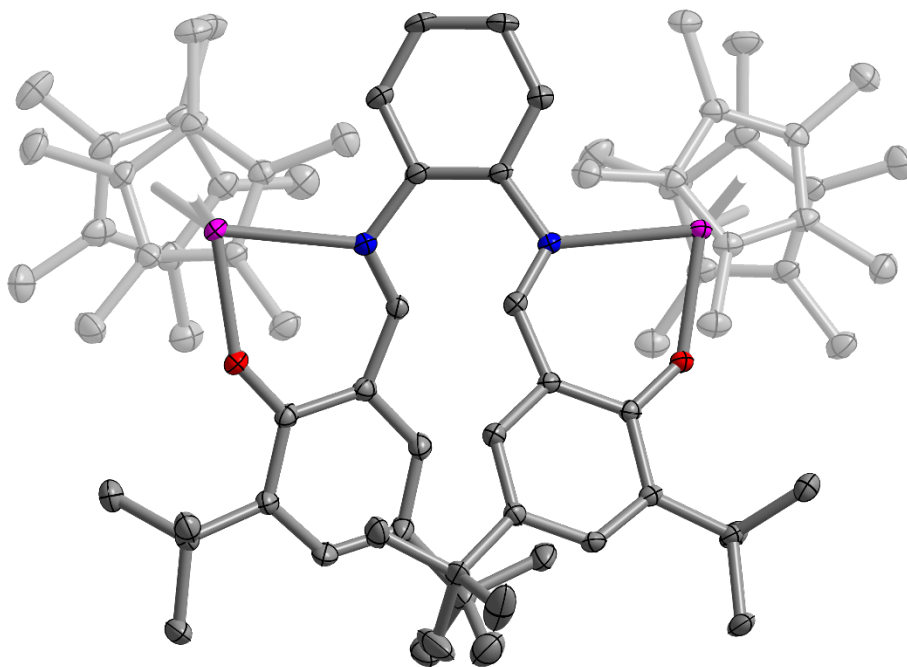

**Fig. S3.** Structure of  $(\text{Cp}^*_2\text{Y})_2(\mu\text{-}^t\text{Bu-salophen})$ , **3**, with thermal ellipsoids drawn at 50% probability level. (Top) Top perspective of **3**, with corresponding atom labels. (Bottom) Front perspective of **3**. Pink, red, blue, and grey ellipsoids represent Y, O, N, and C atoms, respectively.  $(\text{Cp}^*)^-$  ligands have been faded for clarity. Hydrogen atoms, and solvent molecules in the crystal lattice, have been omitted for clarity.

## 2 NMR Spectroscopy

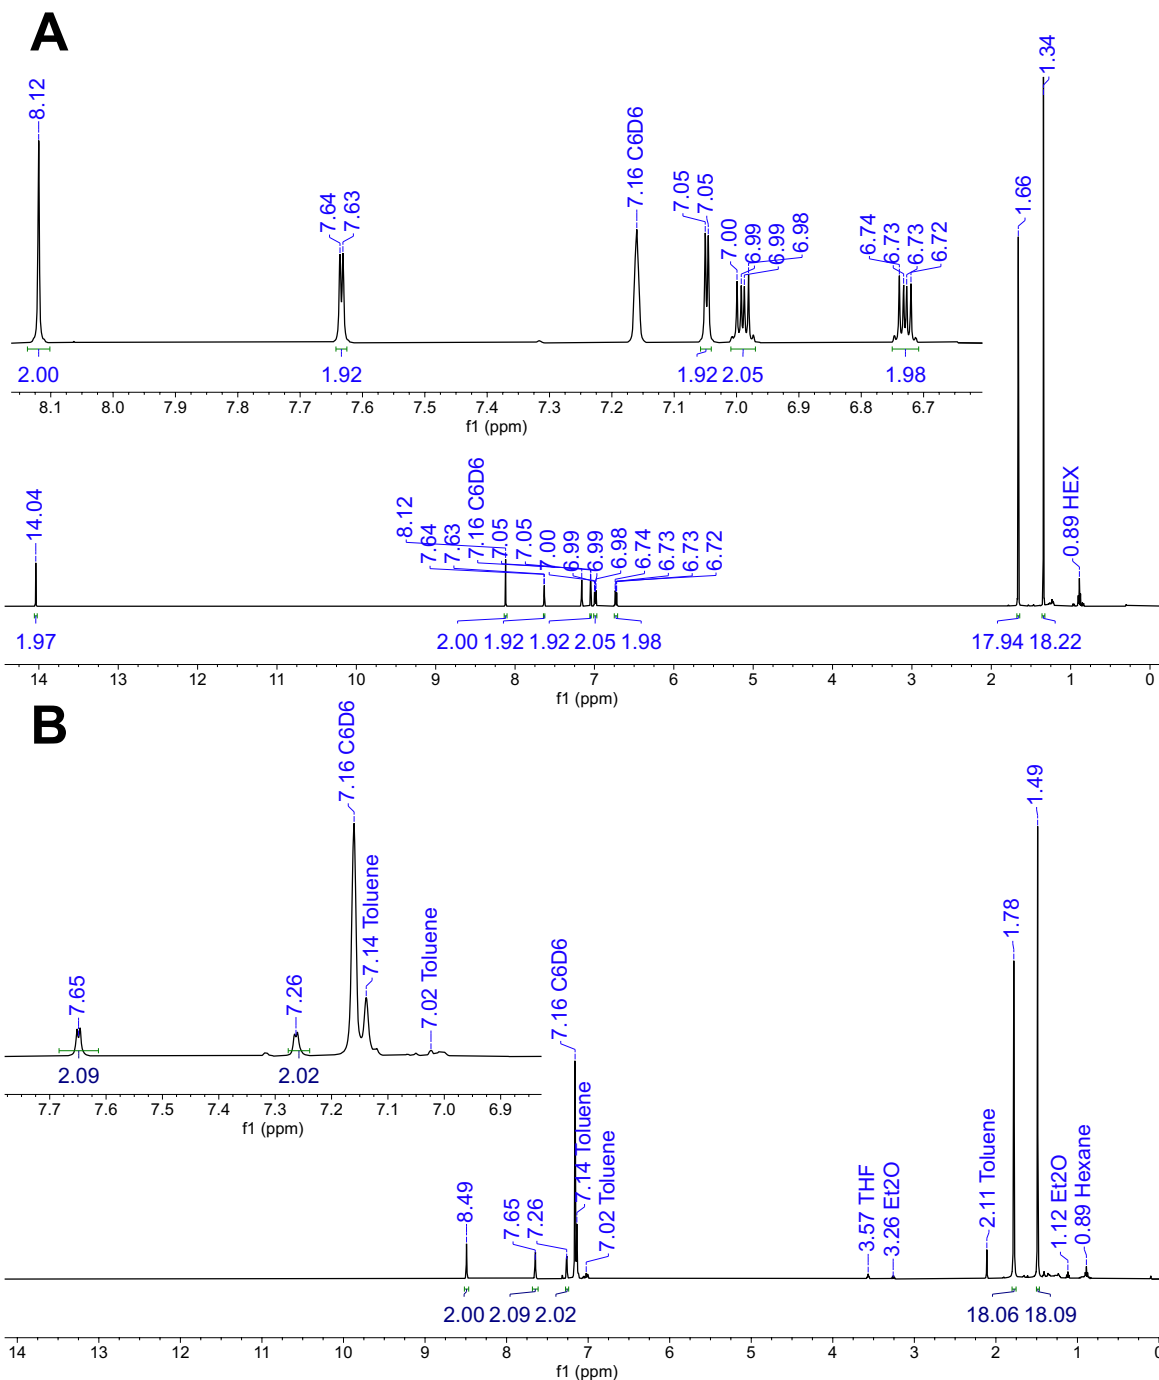

**Fig. S4.** (A)  $^1\text{H}$  NMR (500 MHz,  $\text{C}_6\text{D}_6$ , 25 °C) spectrum of  $\text{H}_2^{\text{tBu}}$ salophen.  $\delta$  (ppm): 14.04 (s, 2H, ( $\text{C}_6\text{H}_2$ )-OH), 8.12 (s, 2H,  $\text{N=CH}$ ), 7.63 (d,  $^4J_{\text{H-H}} = 2.4$  Hz, 2H,  $p\text{-H}$  ( $\text{C}_6\text{H}_2$ )), 7.05 (d,  $^4J_{\text{H-H}} = 2.4$  Hz, 2H,  $o\text{-H}$  ( $\text{C}_6\text{H}_2$ )), 6.99 (dd,  $^3J_{\text{H-H}} = 5.9, 3.4$  Hz, 2H,  $m\text{-CH}$  ( $\text{C}_6\text{H}_4$ )), 6.73 (dd,  $^3J_{\text{H-H}} = 5.9, 3.4$  Hz, 2H,  $o\text{-CH}$  ( $\text{C}_6\text{H}_4$ )), 1.66 (s, 18H,  $\text{CMe}_3$ ), 1.34 (s, 18H,  $\text{CMe}_3$ ). (B)  $^1\text{H}$  NMR (500 MHz,  $\text{C}_6\text{D}_6$ , 25 °C) spectrum of  $\text{K}_2^{\text{tBu}}$ salophen.  $\delta$  (ppm): 8.49 (s, 2H,  $\text{N=CH}$ ), 7.65 (d,  $^4J_{\text{H-H}} = 2.8$  Hz, 2H,  $p\text{-CH}$  ( $\text{C}_6\text{H}_2$ )), 7.26 (d,  $^4J_{\text{H-H}} = 2.8$  Hz, 2H,  $o\text{-CH}$  ( $\text{C}_6\text{H}_4$ )), 1.78 (s, 18H,  $\text{CMe}_3$ ), 1.49 (s, 18H,  $\text{CMe}_3$ ). The  $^1\text{H}$  NMR peaks of the  $m\text{-CH}$  ( $\text{C}_6\text{H}_4$ ) and  $o\text{-CH}$  ( $\text{C}_6\text{H}_4$ ) protons overlay with the solvent, and thus, are not assigned.



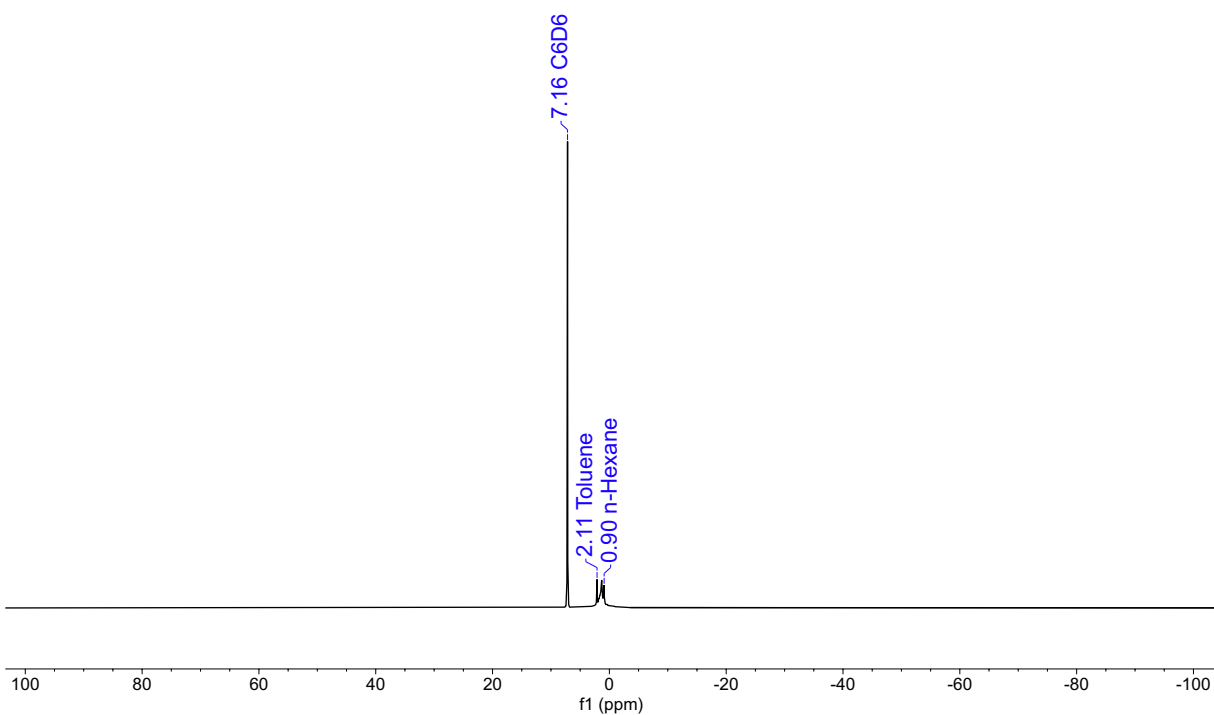

**Fig. S5.**  $^1\text{H}$  NMR (500 MHz,  $\text{C}_6\text{D}_6$ , 25  $^\circ\text{C}$ ) spectrum of  $(\text{Cp}^*_2\text{Gd})_2(\mu\text{-}^t\text{Bu salophen})$ , **1**. Due to the paramagnetic nature of **1**, no signals were observed in the  $^1\text{H}$  NMR spectrum.

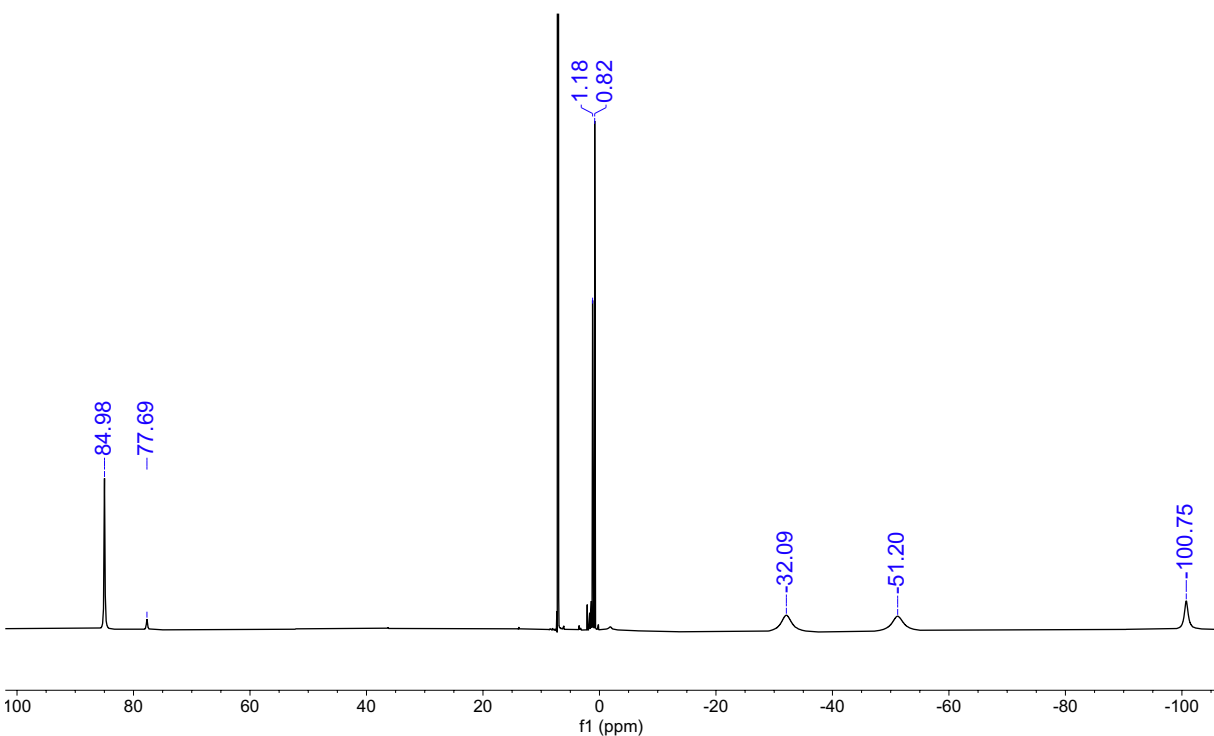

**Fig. S6.**  $^1\text{H}$  NMR (500 MHz,  $\text{C}_6\text{D}_6$ , 25  $^\circ\text{C}$ ) spectrum of  $(\text{Cp}^*_2\text{Dy})_2(\mu\text{-}^t\text{Bu salophen})$ , **2**.  $\delta$  (ppm): 84.98, 77.69, 7.32, 7.00, 1.18, 0.82, -32.09 (br), -51.20 (br), -100.75.

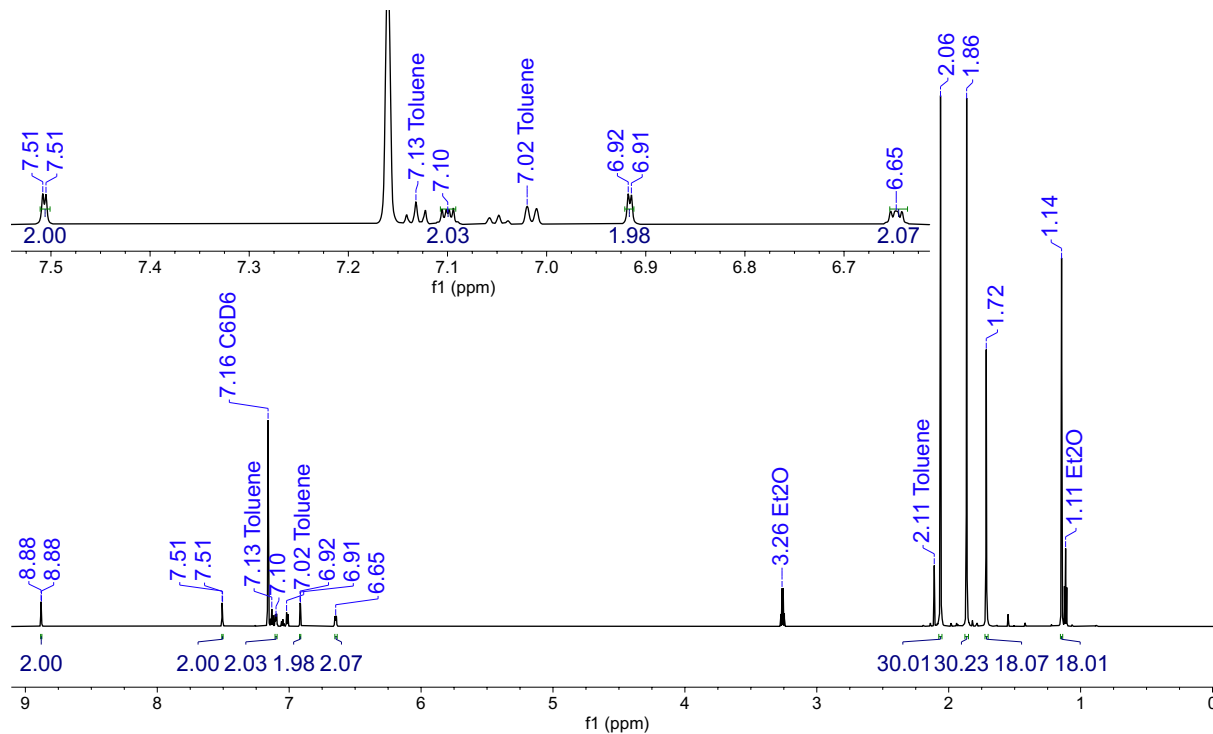

**Fig. S7.**  $^1\text{H}$  NMR (800 MHz,  $\text{C}_6\text{D}_6$ , 25  $^\circ\text{C}$ ) spectrum of  $(\text{Cp}^*_2\text{Y})_2(\mu\text{-}^t\text{Bu-salophen})$ , **3**.  $\delta$  (ppm): 8.88 (d,  $^3J_{\text{Y-H}} = 2.2$  Hz, 2H, N=CH), 7.51 (d,  $^4J_{\text{H-H}} = 2.6$  Hz, 2H, *p*-CH ( $\text{C}_6\text{H}_2$ )), 7.10 (dd,  $^3J_{\text{H-H}} = 5.8$ , 3.4 Hz, 2H, *m*-CH ( $\text{C}_6\text{H}_4$ )), 6.92 (d,  $^4J_{\text{H-H}} = 2.6$  Hz, 2H, *o*-CH ( $\text{C}_6\text{H}_2$ )), 6.65 (dd,  $^3J_{\text{H-H}} = 5.8$ , 3.4 Hz, 2H, *o*-CH ( $\text{C}_6\text{H}_4$ )), 2.06 (s, 30H,  $\text{C}_5\text{Me}_5$ ), 1.86 (s, 30H,  $\text{C}_5\text{Me}_5$ ), 1.72 (s, 18H,  $\text{CMe}_3$ ), 1.14 (s, 18H,  $\text{CMe}_3$ ).

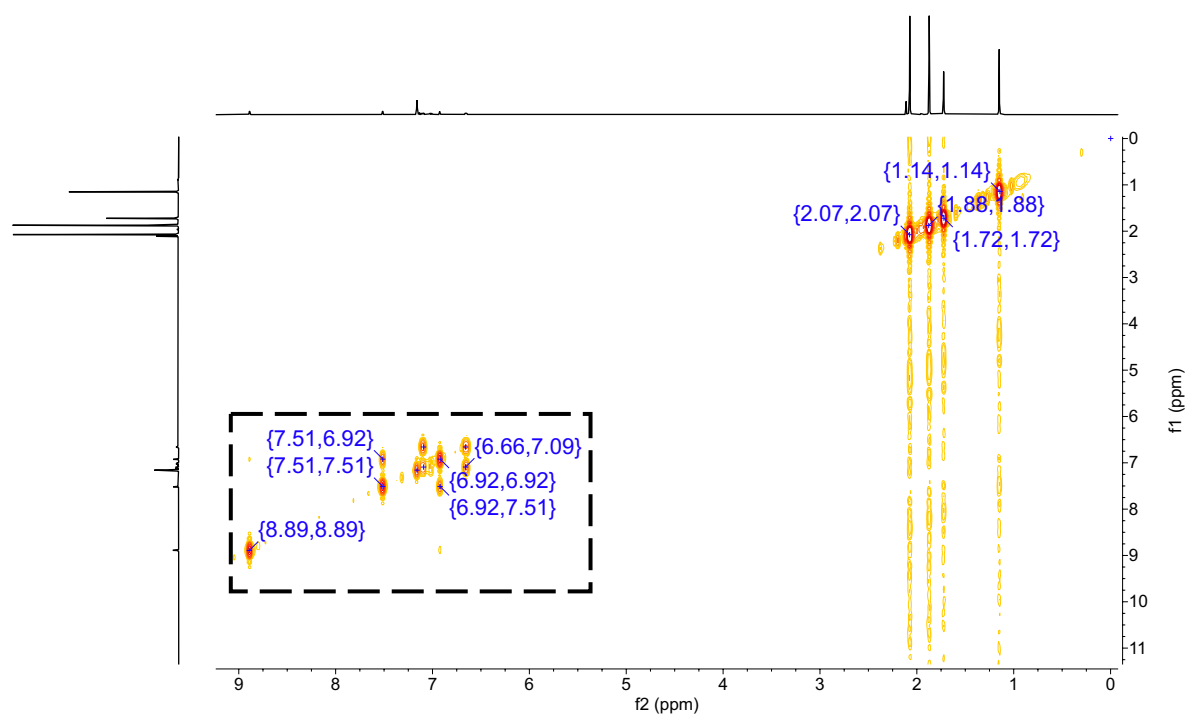

**Fig. S8.**  $^1\text{H}$ - $^1\text{H}$  COSY (500 MHz,  $\text{C}_6\text{D}_6$ , 25 °C) spectrum of  $(\text{Cp}^*_2\text{Y})_2(\mu\text{-}^t\text{Bu salophen})$ , **3**.

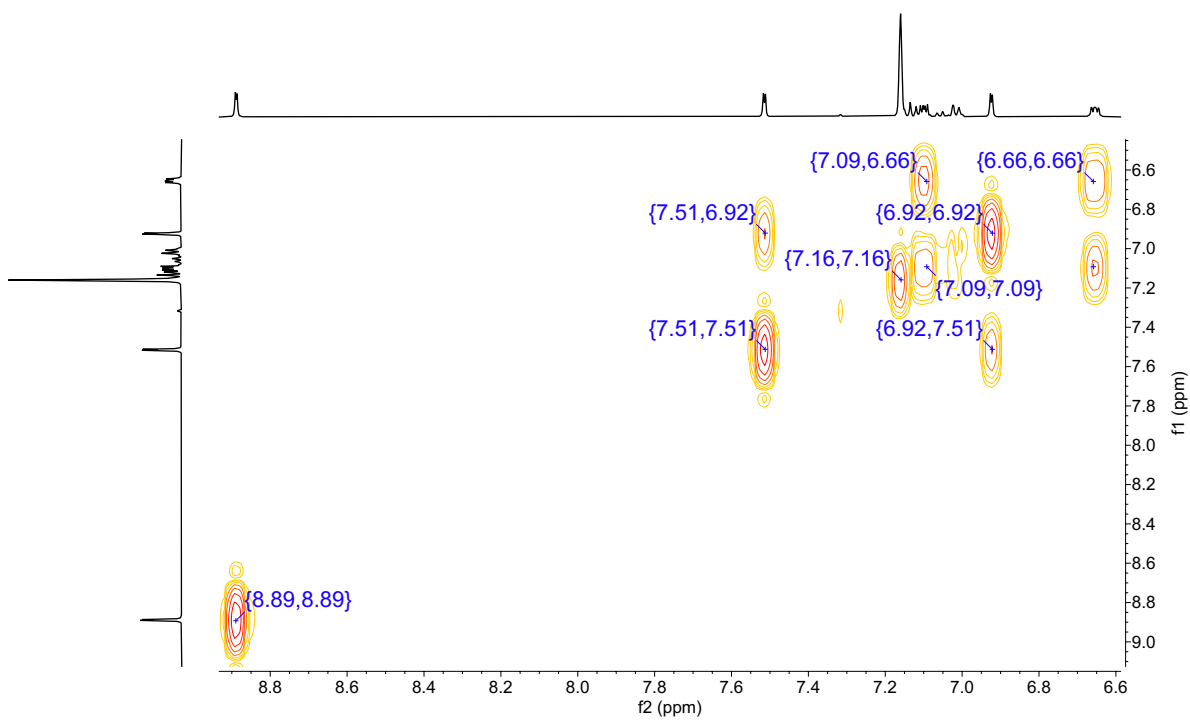

**Fig. S9.** Enlarged  $^1\text{H}$ - $^1\text{H}$  COSY (500 MHz,  $\text{C}_6\text{D}_6$ , 25 °C) spectrum of  $(\text{Cp}^*_2\text{Y})_2(\mu\text{-}^t\text{Bu salophen})$ , **3**.

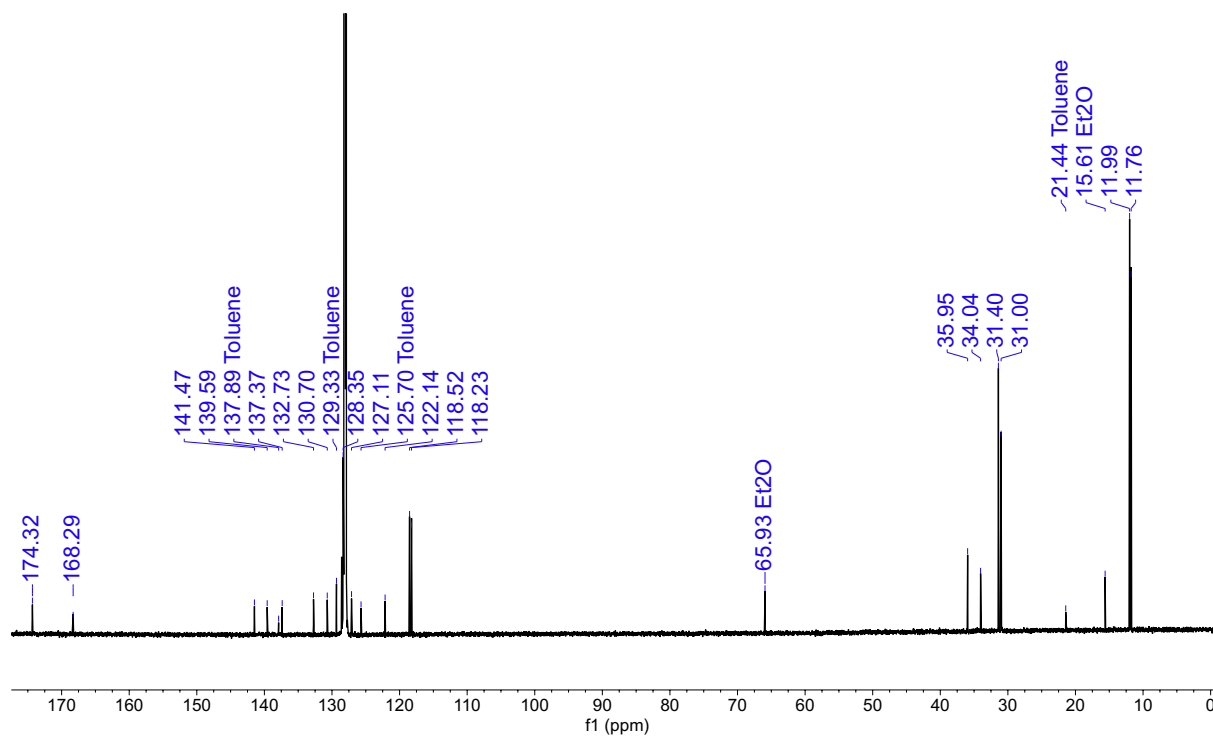

**Fig. S10.**  $^{13}\text{C}$  NMR (800 MHz,  $\text{C}_6\text{D}_6$ , 25  $^\circ\text{C}$ ) spectrum of  $(\text{Cp}^*_2\text{Y})_2(\mu\text{-}^t\text{Bu salophen})$ , **3**.  $\delta$  (ppm): 174.32 (N=CH), 168.29 ( $(\text{C}_6\text{H}_2)\text{C-O}$ ), 141.47 ( $(\text{C}_6\text{H}_4)\text{C-N}$ ), 139.59 ( $(\text{C}_6\text{H}_2)\text{C-CMe}_3$ ), 137.37 ( $(\text{C}_6\text{H}_2)\text{C-CMe}_3$ ), 132.73 (*p*-CH ( $\text{C}_6\text{H}_2$ )), 130.70 (*o*-CH ( $\text{C}_6\text{H}_2$ )), 128.35 (*m*-CH ( $\text{C}_6\text{H}_4$ )), 127.11 (*o*-CH ( $\text{C}_6\text{H}_4$ )), 122.14 ( $(\text{C}_6\text{H}_2)\text{C-CH}$ ), 118.52 ( $\text{C}_5\text{Me}_5$ ), 118.23 ( $\text{C}_5\text{Me}_5$ ), 35.95 ( $\text{CMe}_3$ ), 34.04 ( $\text{CMe}_3$ ), 31.40 ( $\text{CMe}_3$ ), 31.00 ( $\text{CMe}_3$ ), 11.99 ( $\text{C}_5\text{Me}_5$ ), 11.76 ( $\text{C}_5\text{Me}_5$ ).

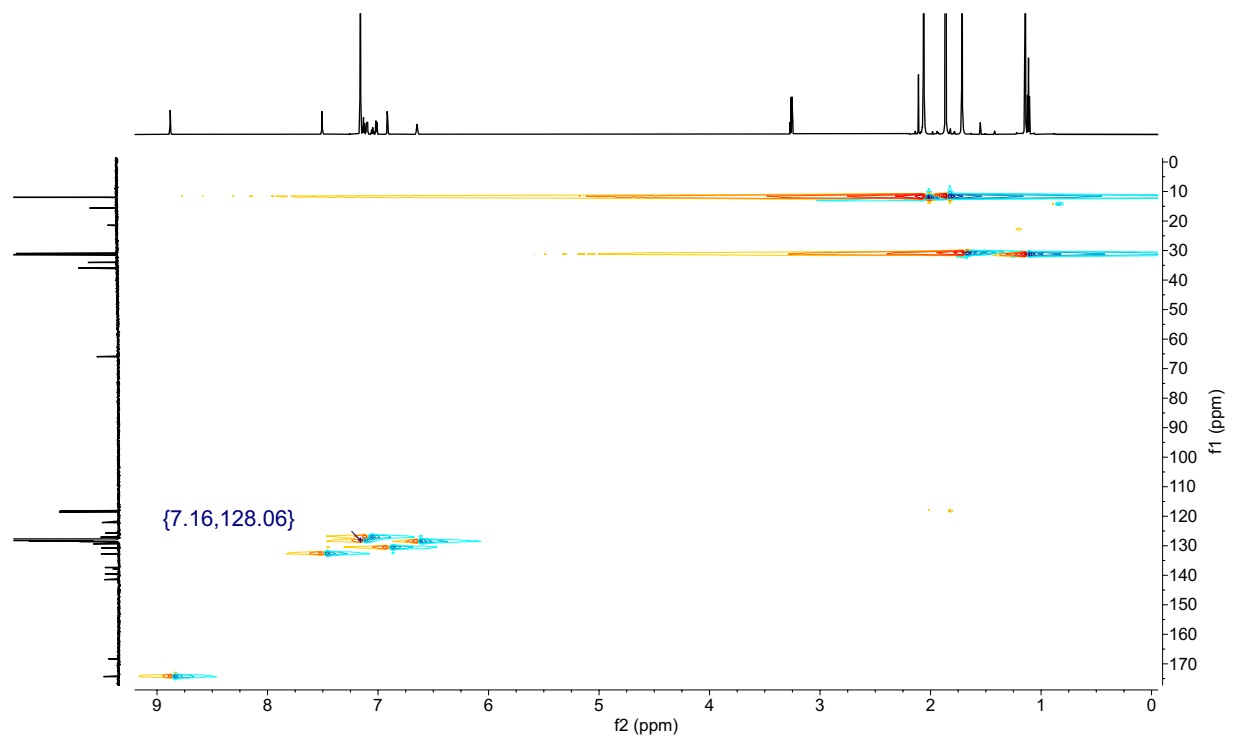

**Fig. S11.**  $^1\text{H}$ - $^{13}\text{C}$  HSQC (500 MHz,  $\text{C}_6\text{D}_6$ , 25  $^\circ\text{C}$ ) spectrum of  $(\text{Cp}^*_2\text{Y})_2(\mu\text{-}^t\text{Bu salophen})$ , **3**.

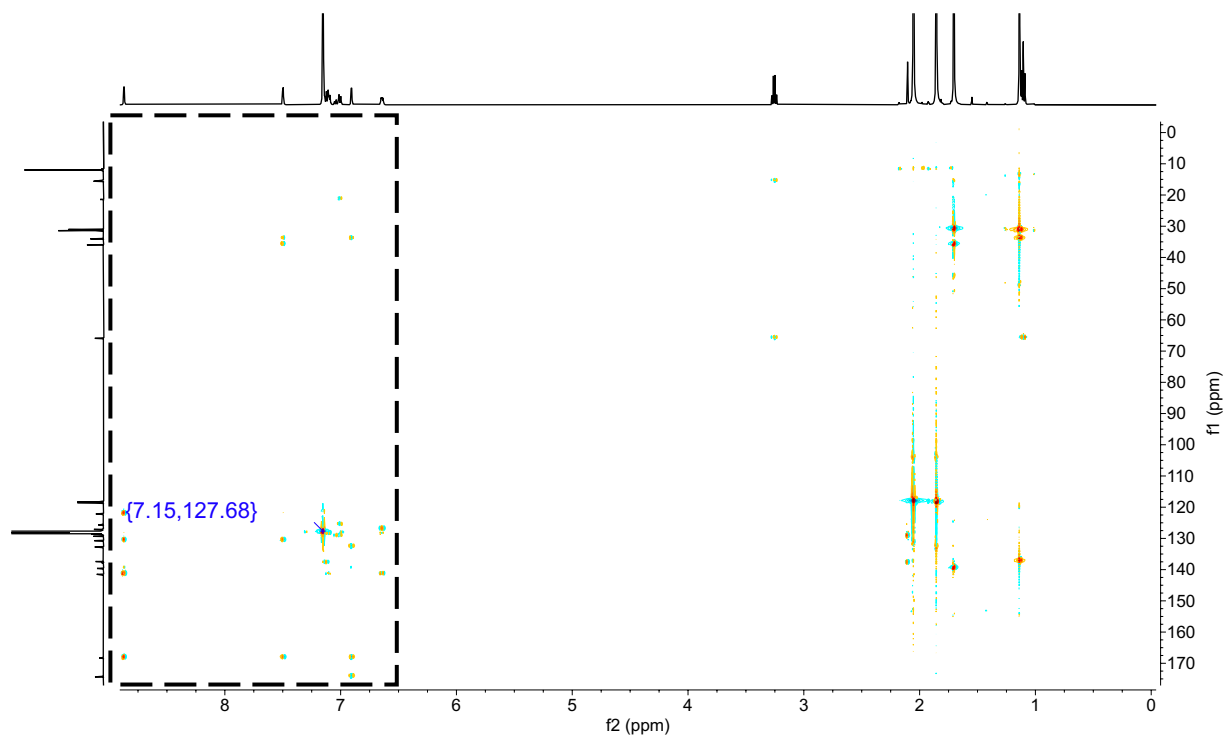

**Fig. S12.**  $^1\text{H}$ - $^{13}\text{C}$  HMBC (500 MHz,  $\text{C}_6\text{D}_6$ , 25° C) spectrum of  $(\text{Cp}^*_2\text{Y})(\mu\text{-}^t\text{Bu})\text{salophen}$ , **3**.

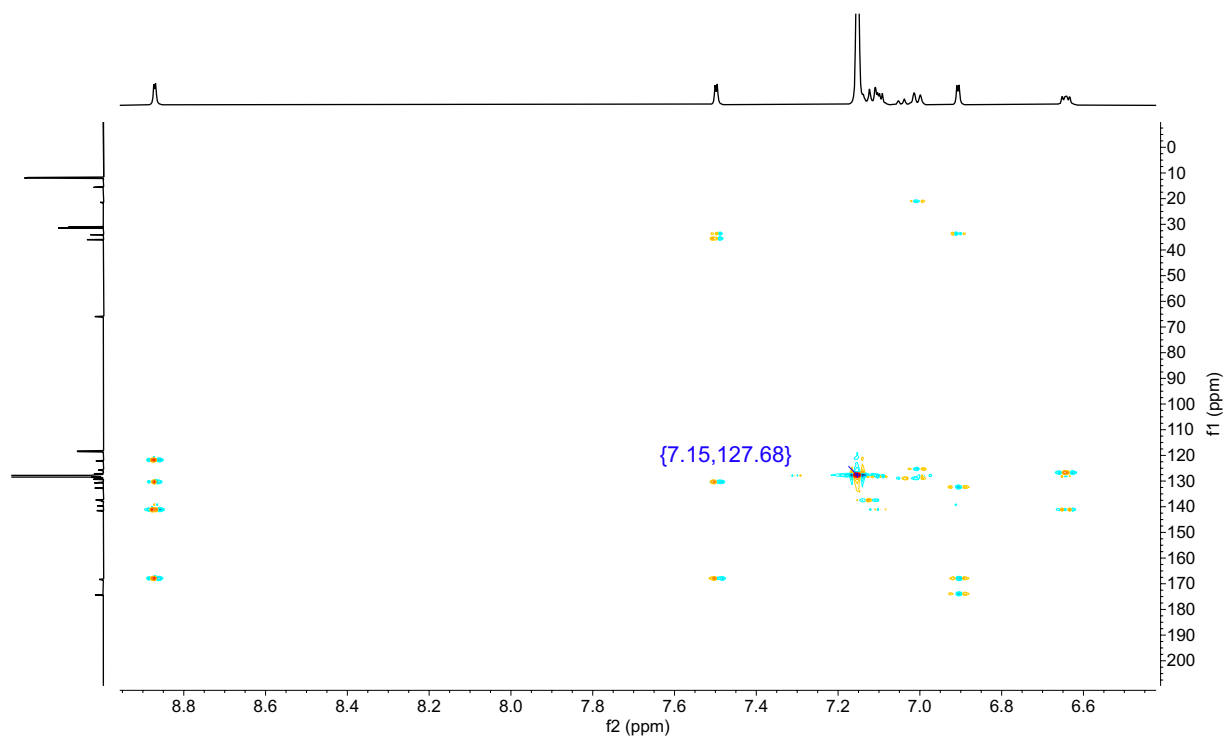

**Fig. S13.** Enlarged  $^1\text{H}$ - $^{13}\text{C}$  HMBC (500 MHz,  $\text{C}_6\text{D}_6$ , 25 °C) spectrum of  $(\text{Cp}^*_2\text{Y})(\mu\text{-}^t\text{Bu})\text{salophen}$ , **3**.

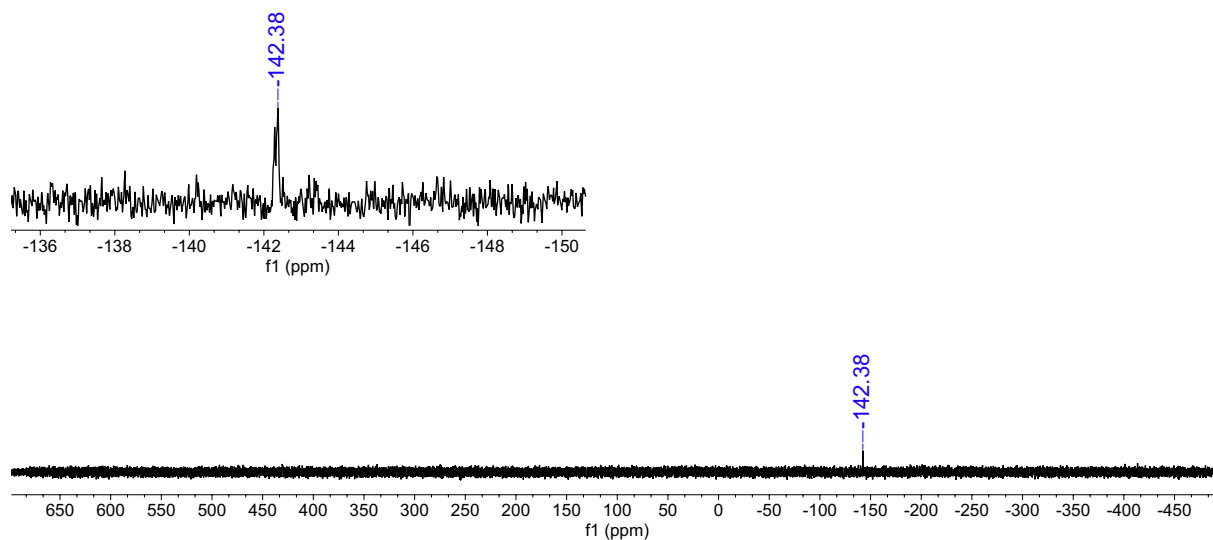

**Fig. S14.** Proton-coupled  $^{89}\text{Y}$  NMR (20 mmol, 500 MHz,  $\text{C}_6\text{D}_6$ , 25  $^\circ\text{C}$ ) spectrum of  $(\text{Cp}^*_2\text{Y})_2(\mu\text{-}^t\text{Bu}\text{salophen})$ , **3**, measured from 700 ppm to  $-500$  ppm in the absence of an external reference.  $\delta$  (ppm):  $-142.38$ .

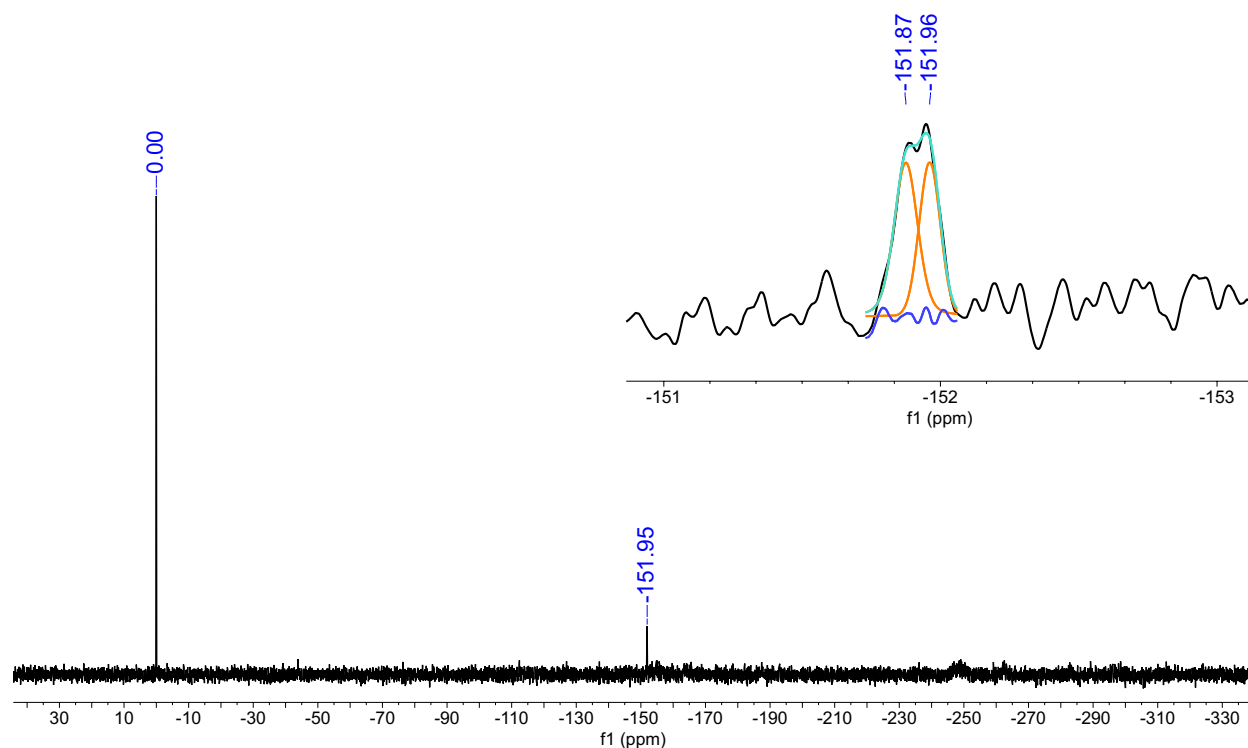

**Fig. S15.** Proton-coupled  $^{89}\text{Y}$  NMR (20 mmol, 500 MHz,  $\text{C}_6\text{D}_6$ , 25  $^\circ\text{C}$ ) spectrum of  $(\text{Cp}^*_2\text{Y})_2(\mu\text{-}^t\text{Bu}\text{salophen})$ , **3**, measured from 50 ppm to  $-350$  ppm. Inset of  $^{89}\text{Y}$  NMR spectrum from  $-151$  to  $-153$  ppm.  $\delta$  (ppm):  $-151.92$  (d,  $^3J_{\text{Y-H}} = 2.2$  Hz,  $\text{N}=\text{CH}$ ). The peak was deconvoluted through a Lorentzian-Gaussian function as implemented in MestReNova V 14.1.1. The turquoise, orange, and blue lines denote the fitted doublet peak, the fitted sum, and residuals, respectively.  $^{89}\text{Y}$  NMR signal is referenced to a 3 M solution of  $\text{YCl}_3$  in  $\text{D}_2\text{O}$ .

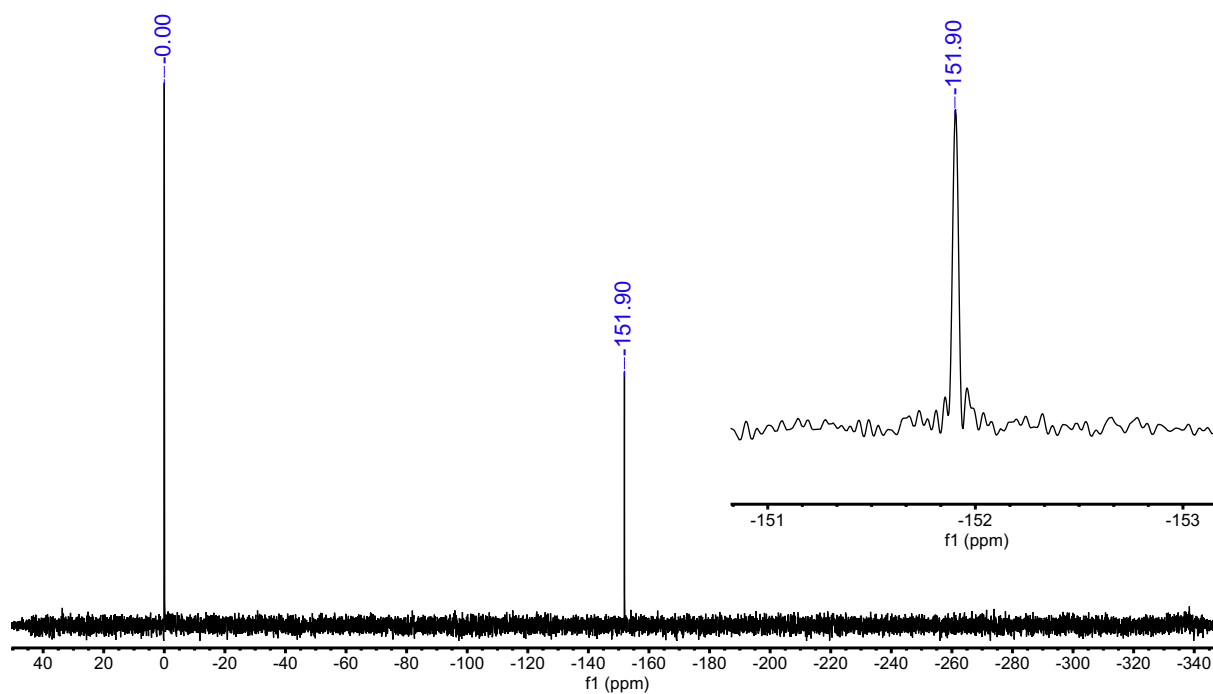

**S16.** Proton-decoupled  $^{89}\text{Y}$  NMR ( $^{89}\text{Y}\{-^1\text{H}\}$ ) (20 mmol, 500 MHz,  $\text{C}_6\text{D}_6$ , 25 °C) spectrum of  $(\text{Cp}^*_2\text{Y})_2(\mu\text{-}^t\text{Bu salophen})$ , **3**, measured from 50 ppm to -350 ppm. Inset of  $^{89}\text{Y}\{-^1\text{H}\}$  NMR spectrum from -151 to -153 ppm.  $\delta$  (ppm): -151.90 (s).  $^{89}\text{Y}$  NMR signal is referenced to a 3 M solution of  $\text{YCl}_3$  in  $\text{D}_2\text{O}$ .



### 3 IR Spectroscopy

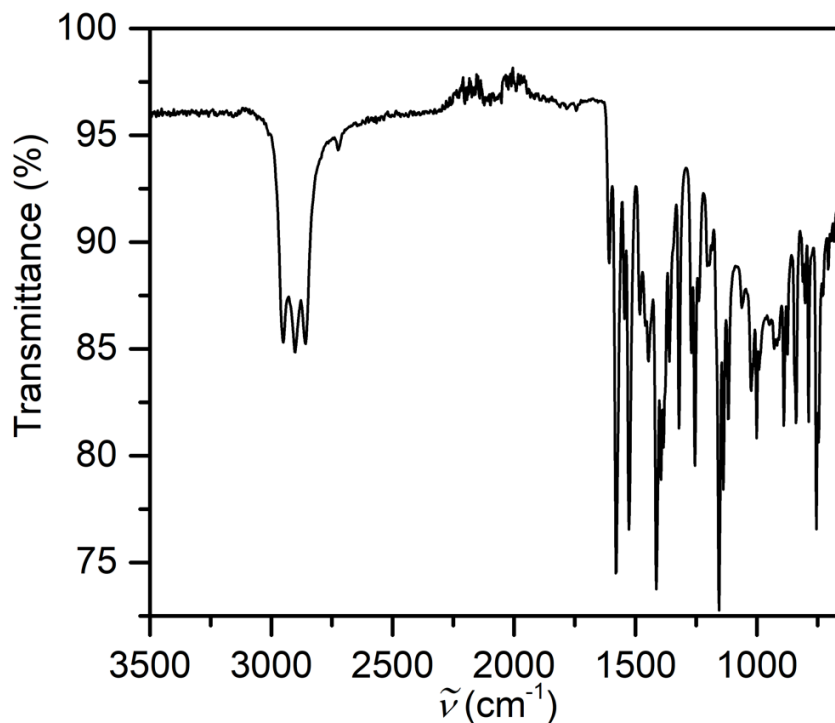

**Fig. S17.** FTIR spectrum on crushed crystalline solids of  $(\text{Cp}^*_2\text{Gd})_2(\mu\text{-}^t\text{Bu-salophen})$ , **1**, measured in a nitrogen-filled glovebox.

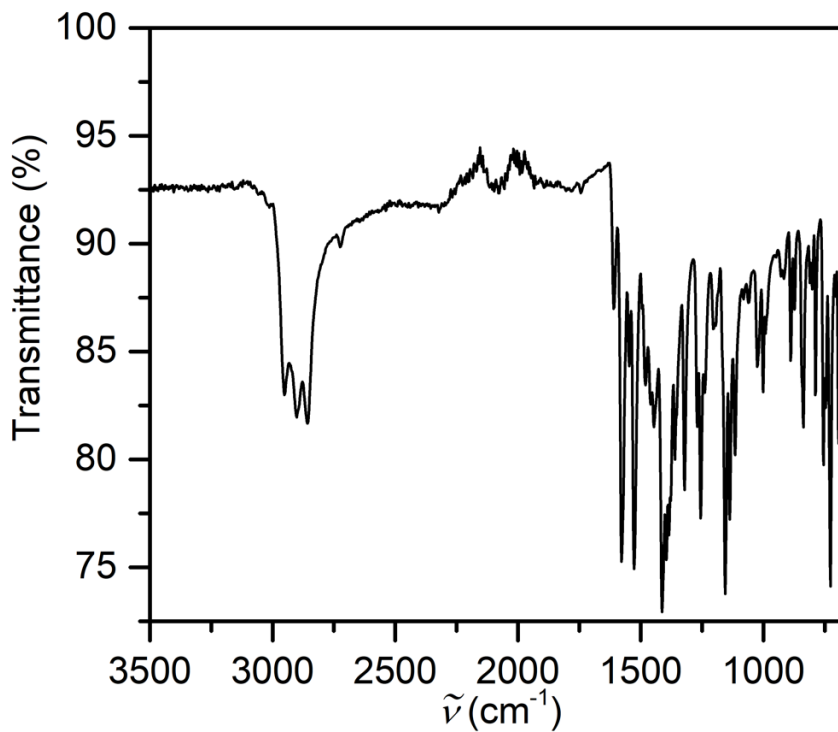

**Fig. S18.** FTIR spectrum on crushed crystalline solids of  $(\text{Cp}^*_2\text{Dy})_2(\mu\text{-}^t\text{Bu-salophen})$ , **2**, measured in a nitrogen-filled glovebox.

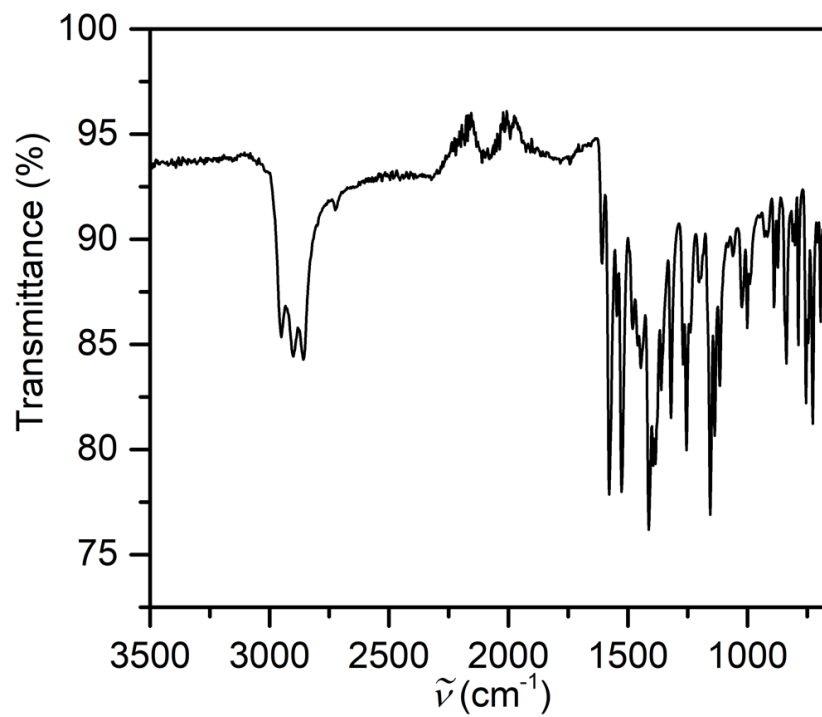

**Fig. S19.** FTIR spectrum on crushed crystalline solids of  $(\text{Cp}^*_2\text{Y})_2(\mu\text{-}^t\text{Bu-salophen})$ , **3**, measured in a nitrogen-filled glovebox.

## 4 Magnetic Measurements

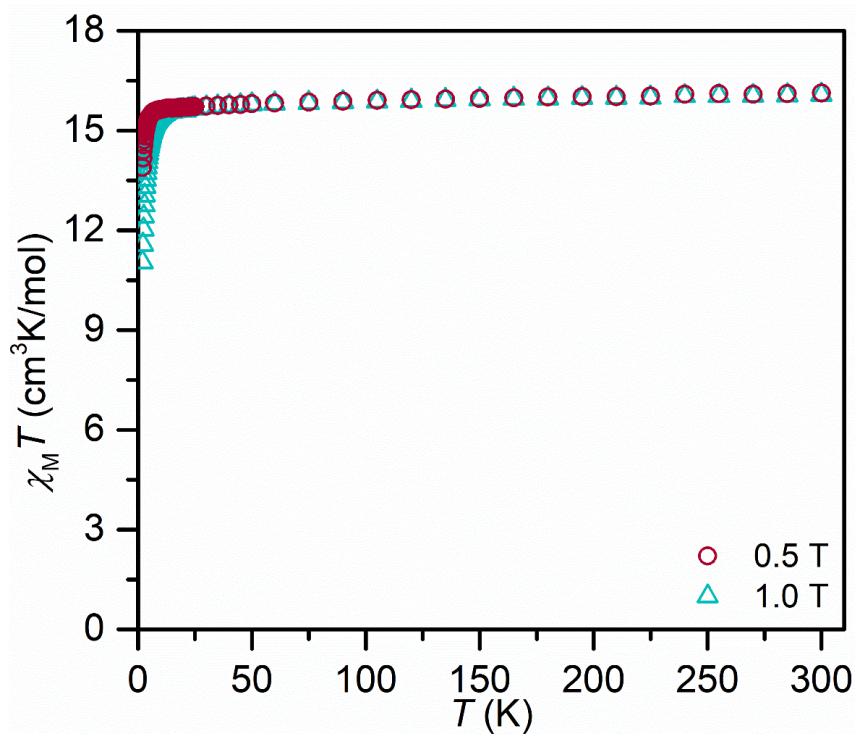

**Fig. S20.** Plots of  $\chi_M T$  vs.  $T$  for  $(\text{Cp}^*\text{}_2\text{Gd})_2(\mu\text{-}^t\text{Bu-salophen})$ , **1**, between 2 and 300 K under an applied dc field of 0.5 T (red circles), and 1.0 T (cyan triangles).

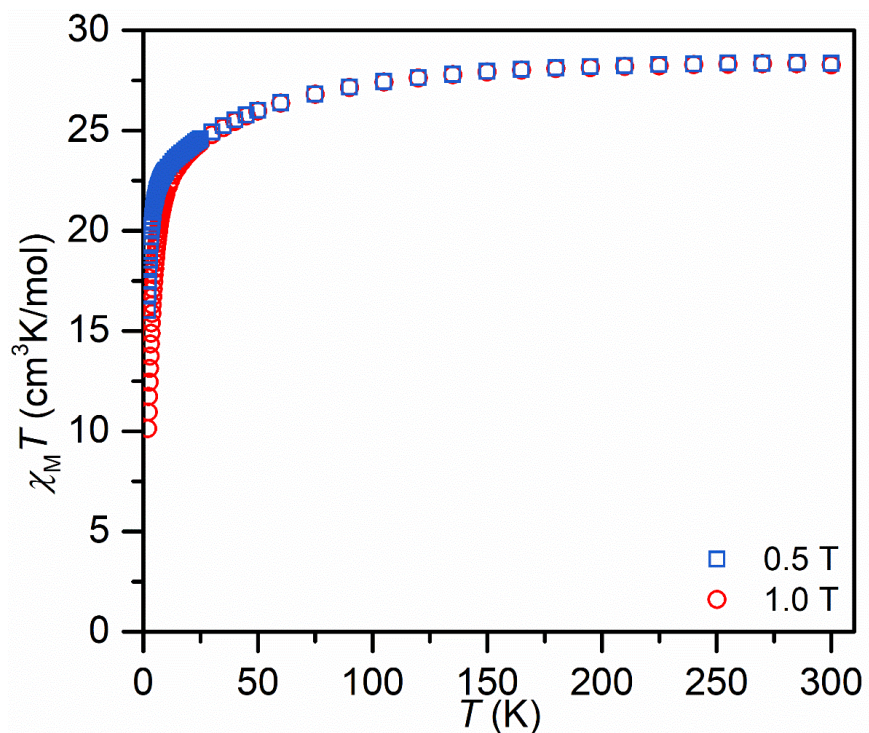

**Fig. S21.** Plots of  $\chi_M T$  vs.  $T$  for  $(\text{Cp}^*\text{}_2\text{Dy})_2(\mu\text{-}^t\text{Bu-salophen})$ , **2**, between 2 and 300 K under an applied dc field of 0.5 T (blue squares), and 1.0 T (red circles).

**Table S2.** Magnetic exchange coupling constant,  $J$ ,  $g$  values, and residuals from fitting  $\chi_M T$  vs.  $T$  for **1** between 1.8 and 300 K under an applied dc field of 0.5 and 1.0 T with PHI.<sup>1</sup>

|              | $g$    | $J$ ( $\text{cm}^{-1}$ ) | $zJ'$ ( $\text{cm}^{-1}$ ) | <i>Residuals</i> |
|--------------|--------|--------------------------|----------------------------|------------------|
| <b>0.5 T</b> | 2.0542 | -                        | -                          | 66.4176          |
| <b>0.5 T</b> | 1.9923 | $0.0295 \pm 0.0029$      | -                          | 18.7860          |
| <b>0.5 T</b> | 1.9923 | -                        | $0.0105 \pm 0.0002$        | 4.8147           |
| <b>0.5 T</b> | 1.9947 | $-0.049 \pm 0.0037$      | $0.0178 \pm 0.001$         | 3.3652           |
| <b>1.0 T</b> | 2.0269 | -                        | -                          | 4.8486           |
| <b>1.0 T</b> | 2.0077 | $-0.0053 \pm 0.0004$     | -                          | 0.4621           |
| <b>1.0 T</b> | 2.0100 | -                        | $0.0030 \pm 0.0001$        | 0.5149           |
| <b>1.0 T</b> | 2.0066 | $-0.0823 \pm 0.0032$     | $0.0215 \pm 0.0013$        | 1.0191           |

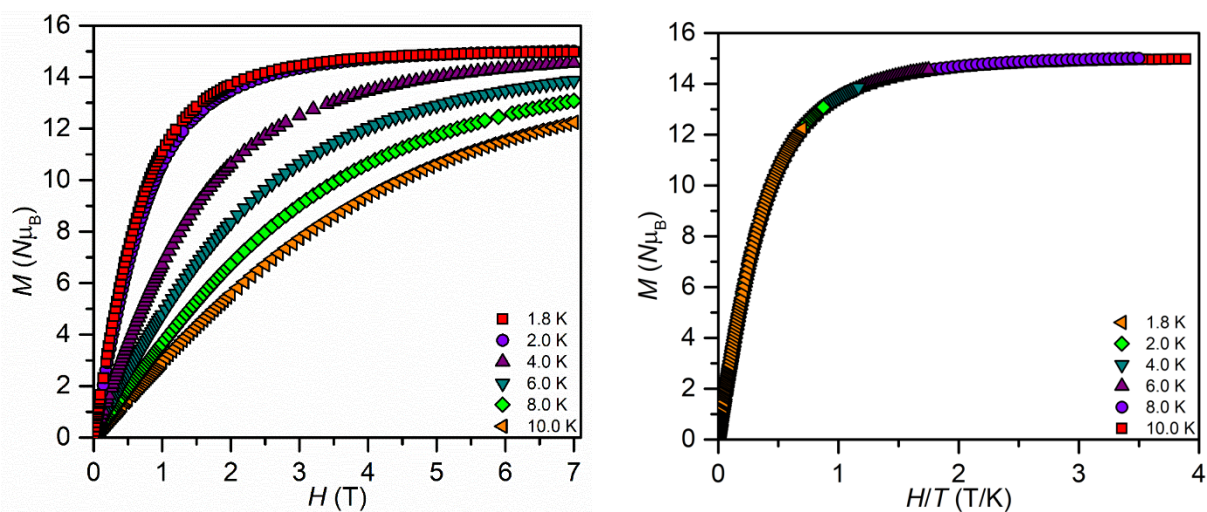

**Fig. S22.** Field-dependent magnetization (left) and reduced magnetization (right) data for  $(\text{Cp}^*_2\text{Gd})_2(\mu\text{-}^t\text{Bu-salophen})$ , **1**, between 0 and 7 T from 1.8 to 10 K.

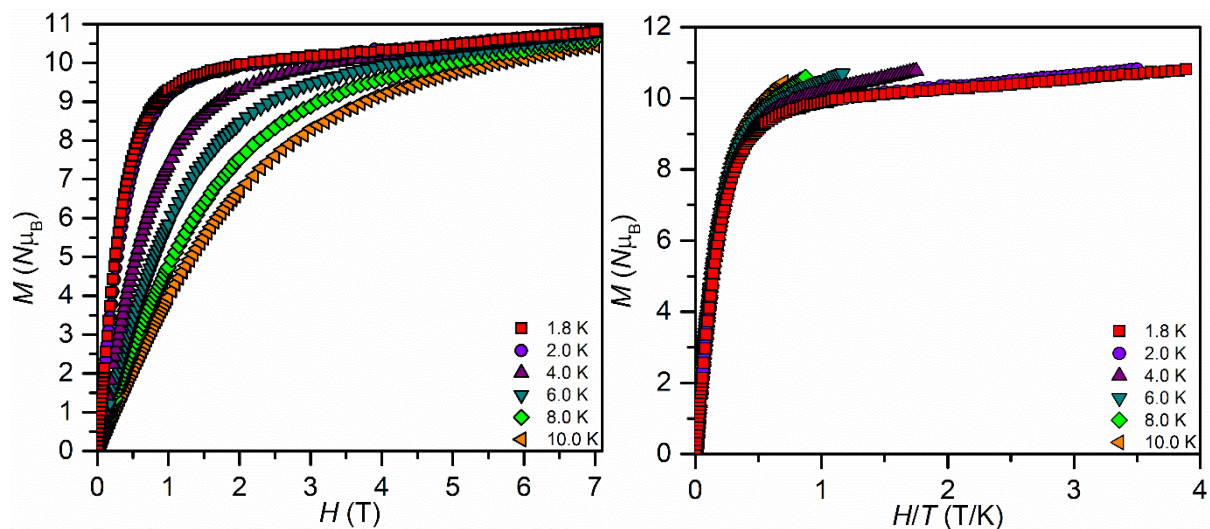

**Fig. S23.** Field-dependent magnetization (left) and reduced magnetization (right) data for  $(\text{Cp}^*\text{Dy})_2(\mu\text{-}^t\text{Bu-salophen})$ , **2**, between 0 and 7 T from 1.8 to 10 K.

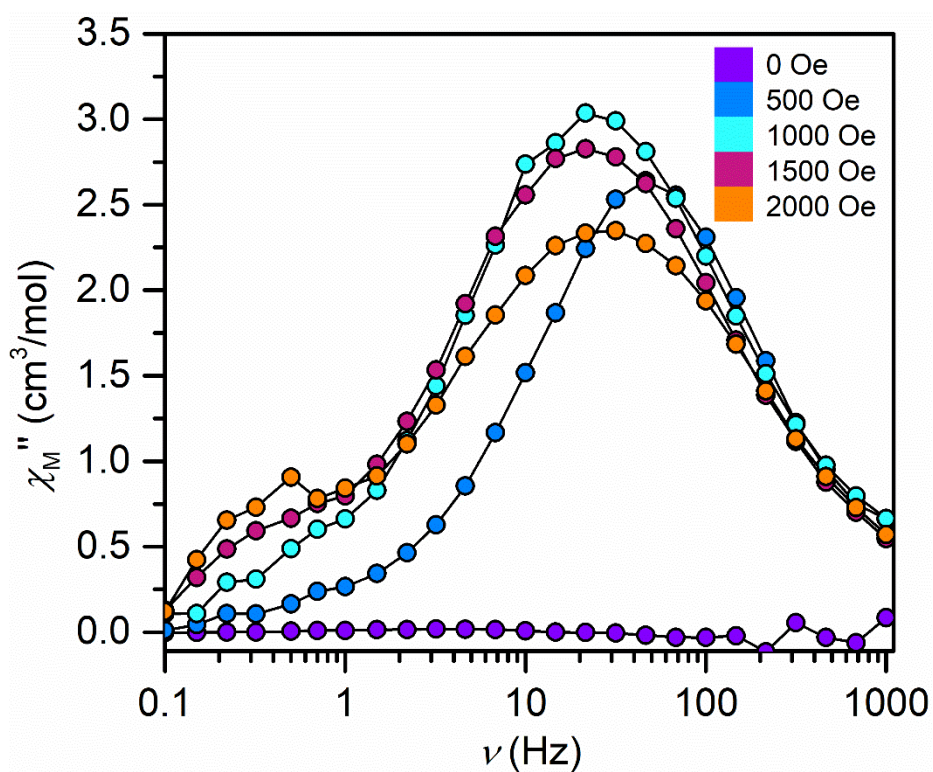

**Fig. S24.** Ac field scan at 2 K of  $(\text{Cp}^*\text{Dy})_2(\mu\text{-}^t\text{Bu-salophen})$ , **2**, collected from 0 Oe to 2000 Oe in 500 Oe increments. The solid lines represent guides for the eye.



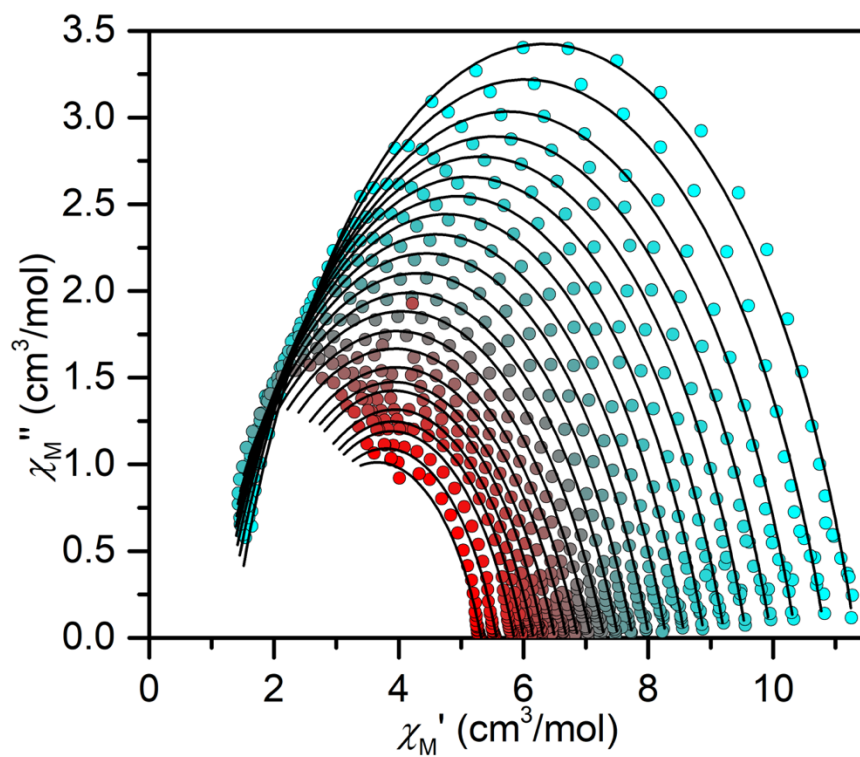

**Fig. S25.** Cole-Cole plots for ac magnetic susceptibility collected from 1.8 to 4.2 K, under a 1000 Oe applied dc field for  $(\text{Cp}^*_2\text{Dy})_2(\mu\text{-}^t\text{Bu-salophen})$ , **2**. The solid lines represent fits to the data.

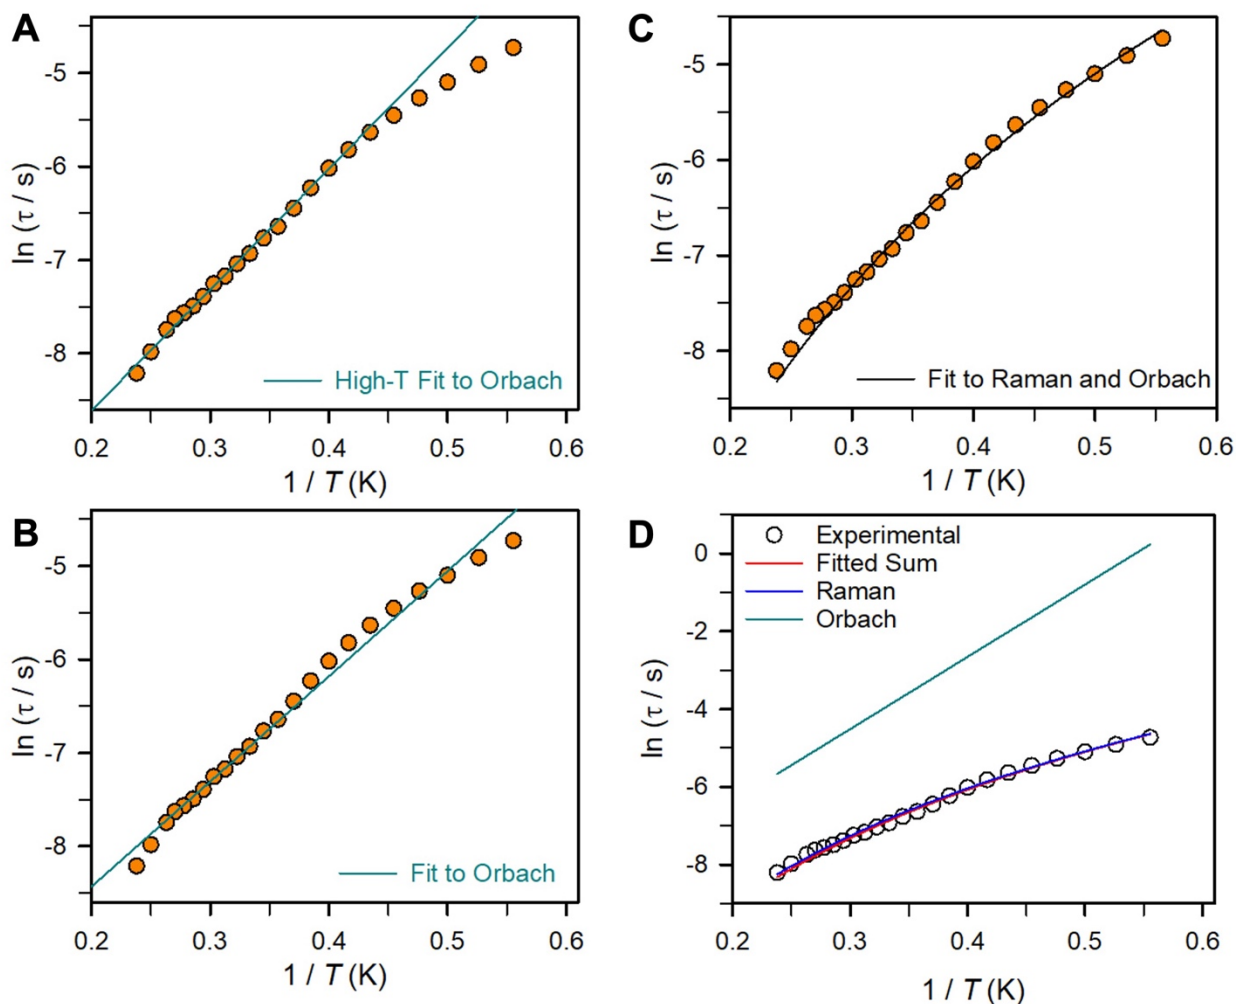

**Fig. S26.** Arrhenius plots of relaxation time data for  $(\text{Cp}^*_2\text{Dy})_2(\mu\text{-}^t\text{Bu salophen})$ , **2**. The orange circles represent the experimental data. The solid lines correspond to fits to data collected between 1.8 and 4.2 K. The solid cyan line in **A** represents a fit of the data between 3.3 and 4.2 K (High-T) to an Orbach process yielding a barrier to spin-reversal of  $U_{\text{eff}} = 8.9(4) \text{ cm}^{-1}$  and a pre-exponential factor of  $\tau_0 = 1.3(2) \cdot 10^{-5} \text{ s}$ . Fitting the entire probed temperature range, **B**, solid cyan line, from 1.8 to 4.2 K afforded a similar barrier height and attempt time:  $U_{\text{eff}} = 7.8(2) \text{ cm}^{-1}$  and  $\tau_0 = 2.3(2) \cdot 10^{-5} \text{ s}$ . The solid black line in **C** represents a fit to a Raman and Orbach relaxation process to give  $C = 8.39 \text{ s}^{-1}\text{K}^{-n}$ ,  $n = 4.27$ , and  $U_{\text{eff}} = 12.91(5) \text{ cm}^{-1}$  and  $\tau_0 = 4.2(1) \cdot 10^{-5} \text{ s}$ . **D** arises from individual contributions of the Orbach (cyan line) and Raman (blue line) magnetic relaxation pathways to the Arrhenius plot of **2** at 1000 Oe.

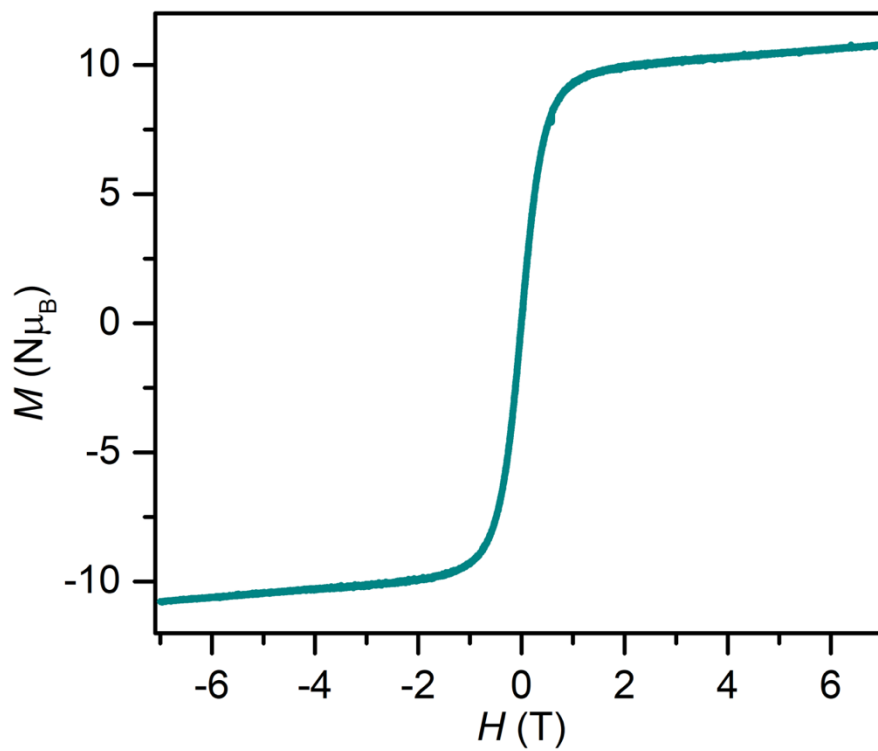

**Fig. S27.** Variable field magnetization ( $M$ ) data for  $(\text{Cp}^*_2\text{Dy})_2(\mu\text{-}^t\text{Bu}\text{-salophen})$ , **2**, at 1.8 K and collected between -7 and +7 T at an average sweep rate of 100 Oe/s.



**Table S3.** Selected multinuclear Gd and Dy complexes containing diamagnetic bridging ligands for which exchange coupling constants were determined, either through direct measurements (Gd) or CASSCF calculations (Dy).  $J$  values are reported on the basis of the Hamiltonian  $\widehat{H} = -2J\widehat{S}_A\widehat{S}_B$  with A and B representing the interactions of paramagnetic centers, metal ions and/or radical ligands. Abbreviations used in the formula are defined underneath the table.

| Formula                                                                                                       | $J$ [ $\text{cm}^{-1}$ ] | Notes | Ref |
|---------------------------------------------------------------------------------------------------------------|--------------------------|-------|-----|
| $\{(\text{Me}_3\text{Si})_2\text{N}\}_2(\text{THF})\text{Ln}\}_2(\mu\text{-}\eta^2\text{:}\eta^2\text{-N}_2)$ | -0.49                    |       | 2   |
| $[\text{Cp}^*_4\text{Dy}_2(\mu\text{-BPh}_4)][\text{Al}(\text{OC}(\text{CF}_3)_3)_4]$                         | 0.0014                   | ac    | 3   |
| $\{[\text{Cp}^*_2\text{Dy}(\mu\text{-Me}_3\text{AlNEt}_3)]_2[\text{Al}\{\text{OC}(\text{CF}_3)_3\}_4]_2$      | -0.21                    | a     | 4   |
| $\{[\text{Cp}'_2\text{Gd}(\mu\text{-SSiPh}_3)]_2$                                                             | -0.105                   |       | 5   |
| $[\text{Cp}'_2\text{Dy}(\text{THF})(\mu\text{-Cl})]_2$                                                        | -1.90525                 | a     | 5   |
| $\{[\text{Cp}'_2\text{Dy}(\mu\text{-Cl})]_2$                                                                  | -4.42025                 | a     | 5   |
| $[\text{Cp}'_2\text{Dy}\{\mu\text{-Sb}(\text{H})\text{Mes}\}]_3$                                              | -0.121                   | b     | 6   |
| $\{[\text{Cp}'_2\text{Dy}\{\mu\text{-}(\text{SbMes})_3\text{Sb}\}]_3$                                         | -0.150                   | b     | 6   |
| $\{[\text{Cp}^*_2\text{Gd}]_2(\mu\text{-ind})\}$                                                              | -0.013(1)                |       | 7   |
| $\{[\text{K}(\text{THF})_3]_2(\text{Cp}^*_2\text{Ln})_2(\mu\text{-ind})\}$                                    | -0.018(1)                |       | 7   |
| $\{[\text{Cp}'_2\text{Dy}\{\mu\text{-As}(\text{H})\text{Mes}\}]_3$                                            | -4.92 - -6.87            | a     | 8   |
| $[\text{Li}(\text{THF})_4]_2\{[\text{Cp}'_2\text{Dy}\{\mu_3\text{-AsMes}\}_3\text{Li}\}\cdot\text{THF}$       | -6.61 - -9.76            | a     | 8   |
| $\{[\text{Cp}'_2\text{Dy}\{\mu\text{-SeMes}\}]_3\cdot\text{tol}$                                              | -4.76 - -5.02            | a     | 8   |
| $\{[\text{Cp}'_2\text{Dy}\{\mu\text{-P}(\text{H})\text{Mes}\}]_3\cdot\text{tol}$                              | -4.13 - -4.08            | b     | 9   |
| $[\text{Li}(\text{THF})_4]_2\{[\text{Cp}'_2\text{Dy}\{\mu\text{-PMes}\}_3\text{Li}\}\cdot\text{THF}$          | -2.702 - -2.749          | b     | 9   |
| $[\text{Cp}'_2\text{Dy}(\mu\text{-Cl})]_2$                                                                    | -4.81                    | b     | 10  |
| $[\text{Cp}'_2\text{Dy}(\mu\text{-Br})]_2$                                                                    | -4.33                    | b     | 10  |
| $[\text{Cp}'_2\text{Dy}(\mu\text{-I})]_2$                                                                     | -3.65                    | b     | 10  |
| $\{[\text{Dy}(\text{BH}_4)_2(\text{THF})_2(\text{Fv}^{\text{ttt}})]_2$                                        | -0.9                     | b,c   | 11  |
| $[\text{Cp}^*\text{Dy}(\mu\text{-BH}_4)]_2(\text{Fv}^{\text{ttt}})$                                           | -2.5                     | b,c   | 11  |
| $\{[\text{Cp}^*\text{Dy}]_2(\mu\text{-BH}_4)(\eta^5\text{:}\eta^5\text{-Fv}^{\text{ttt}})\}$                  | -1.4                     | b,c   | 11  |
| $[\text{Gd}_2(\text{Hhmb})_3(\text{NCS})_3]\cdot 2\text{MeOH}\cdot\text{py}$                                  | -0.02                    |       | 12  |
| $[\text{GdL}_3(\text{H}_2\text{O})_1]_2$                                                                      | 0.05                     |       | 13  |
| $[\text{Gd}_4(\text{HL})_4(\mu_2\text{-MeO})_4]\cdot 4\text{MeOH}$                                            | -0.105                   | d     | 14  |
| $[\text{Gd}(\text{Cy}_3\text{PO})_2(\mu\text{-Br})(\text{Br})_2]_2\cdot 2\text{tol}$                          | -0.029                   |       | 15  |
| $[\text{Gd}_2(\text{L})(\text{Cl-salphen})_2]\cdot 0.5\text{ClCH}_2\text{CH}_2\text{Cl}$                      | -0.024                   | e     | 16  |
| $\text{Gd}_2(\text{thd})_6(4,4'\text{-Bpy})$                                                                  | 0.0491                   |       | 17  |
| $[\text{Gd}_4(\text{LH})_4(\text{LH}_2)_2(\text{MeO})_2]$                                                     | -0.033(1)<br>-0.0133(3)  | d     | 18  |

<sup>a</sup>Derived from CASSCF calculations; <sup>b</sup>Lines model; <sup>c</sup>Dipolar coupling; <sup>d</sup>Cluster complex; <sup>e</sup>Schiff base complex. Bpy = bipyridine, Cl-salphenH<sub>2</sub> = *N,N'*-bis(5-chlorosalicylidene)-*o*-phenylenediamine, Cp' = ( $\eta^5\text{-C}_5\text{H}_4\text{Me}$ ), Fv<sup>ttt</sup> = [1,1',3,3'-(*C*<sub>5</sub><sup>*t*</sup>Bu<sub>2</sub>H<sub>2</sub>)<sub>2</sub>]<sup>2-</sup>, Hhmb = *N'*-(2-hydroxy-3-methoxybenzylidene)benzhydrazide, HL = *N'*-(4-diethylamino-2-hydroxybenzylidene)-6-(hydroxymethyl)picolinohydrazide, L = salicylic acid, ind = indigo, LH = C<sub>11</sub>H<sub>13</sub>N<sub>3</sub>O<sub>4</sub>, Mes = mesityl, thd = 2,2,6,6-tetramethyl-3,5-heptanedione

## 5 Cyclic Voltammetry

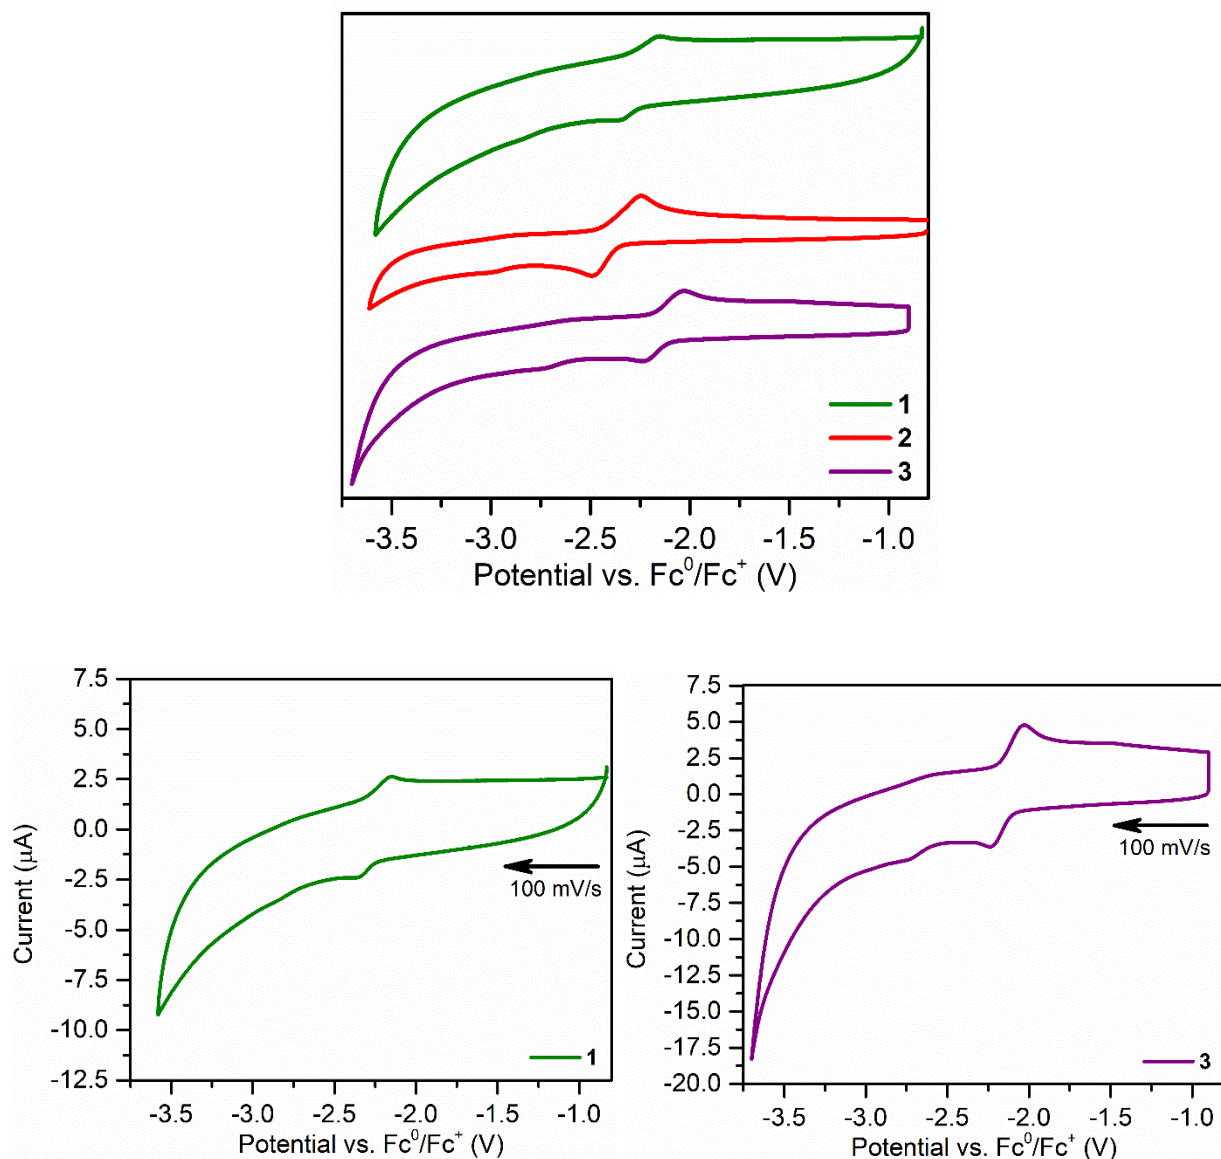

**Fig S28.** Cyclic voltammograms of  $(\text{Cp}^*_2\text{RE})_2(\mu\text{-}^t\text{Bu-salophen})$ , where RE = Gd (**1**), Dy (**2**), and Y (**3**), measured in THF with  $(^n\text{Bu}_4\text{N})(\text{PF}_6)$  (1 mM) as an electrolyte and 100 mV/s scan rate (top). Magnification of the quasi-reversible features at -2.33 V of **1** (bottom left) and at -2.10 V of **3** (bottom right), respectively.

## 6 EPR Spectroscopy

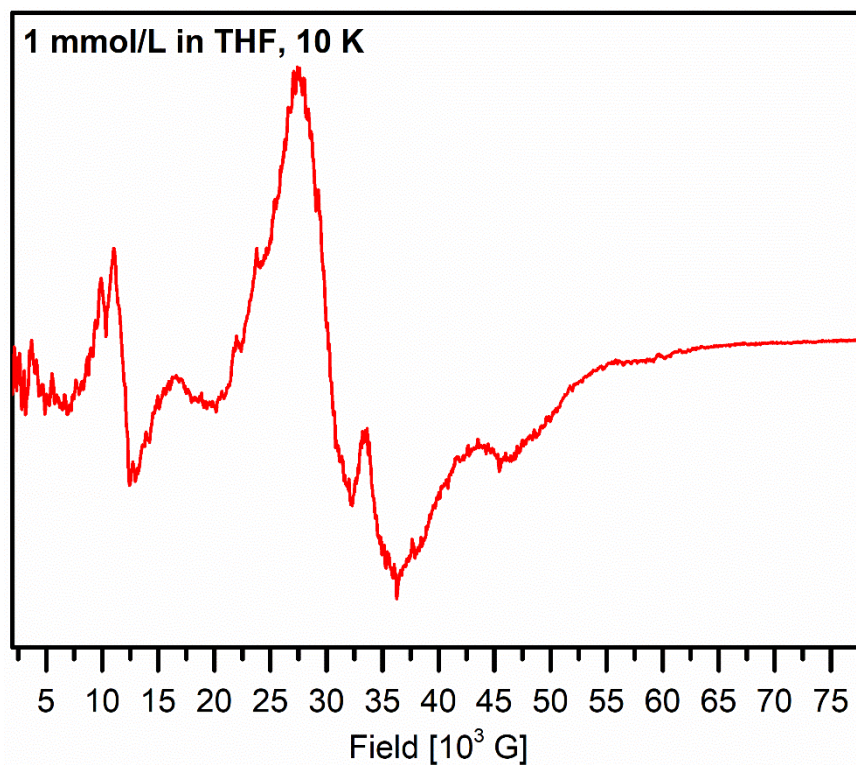

**Fig. S29.** Frozen solution X-band EPR spectrum of  $(\text{Cp}^*_2\text{Gd})_2(\mu\text{-}^t\text{Bu}\text{-salophen})$ , **1**, in THF, recorded at 10 K at 9.397 GHz with a 5.00 G modulation amplitude, 36.0 dB attenuation and a 60 dB gain.

## 7 DFT Calculations

**Table S4.** Metrical parameters for  $(\text{Cp}^*\text{Y})_2(\mu\text{-}^t\text{Bu}\text{salophen})$ , **3**, calculated as a neutral singlet using the B3LYP functional with varying basis sets.

|                     | Exp        | def2-SV(P)<br>6-31+Gdp | def2-SV(P)<br>6-31Gdp | def2-SV(P) | def2-TZVP<br>6-311Gdp |
|---------------------|------------|------------------------|-----------------------|------------|-----------------------|
| <b>Distance (Å)</b> |            |                        |                       |            |                       |
| <b>Y1-Cp</b>        | 2.6844     | 2.7176                 | 2.7135                | 2.7136     | 2.7074                |
| <b>Y2-Cp</b>        | 2.6915     | 2.7176                 | 2.7136                | 2.7138     | 2.7076                |
| <b>Y1-O1</b>        | 2.1679(15) | 2.1890                 | 2.1900                | 2.1870     | 2.1860                |
| <b>Y2-O2</b>        | 2.1762(15) | 2.1890                 | 2.1900                | 2.1870     | 2.1860                |
| <b>Y1-N1</b>        | 2.4471(18) | 2.4610                 | 2.4570                | 2.4590     | 2.4640                |
| <b>Y2-N2</b>        | 2.4518(18) | 2.4600                 | 2.4570                | 2.4590     | 2.4640                |
| <b>O1-C21</b>       | 1.309(3)   | 1.3050                 | 1.3050                | 1.2980     | 1.3010                |
| <b>O2-C22</b>       | 1.308(3)   | 1.3050                 | 1.3050                | 1.2980     | 1.3010                |
| <b>N1-C24</b>       | 1.309(3)   | 1.3110                 | 1.3110                | 1.3100     | 1.3070                |
| <b>N2-C26</b>       | 1.301(3)   | 1.3110                 | 1.3110                | 1.3100     | 1.3070                |
| <b>N1-C23</b>       | 1.435(3)   | 1.4240                 | 1.4230                | 1.4200     | 1.4240                |
| <b>N2-C25</b>       | 1.433(3)   | 1.4240                 | 1.4230                | 1.4200     | 1.4240                |
| <b>C24-C52</b>      | 1.438(3)   | 1.4360                 | 1.4350                | 1.4370     | 1.4340                |
| <b>C26-C64</b>      | 1.432(3)   | 1.4360                 | 1.4350                | 1.4370     | 1.4340                |
| <b>MD</b>           |            | 0.0073                 | 0.0061                | 0.0047     | 0.0045                |
| <b>MSE</b>          |            | 0.0002                 | 0.0002                | 0.0002     | 0.0001                |
| <b>RMSE</b>         |            | 0.0146                 | 0.0134                | 0.0140     | 0.0120                |
| <b>MAPE</b>         |            | 0.272%                 | 0.216%                | 0.112%     | 0.111%                |

  

|                  | Exp          | def2-SV(P)<br>6-31+Gdp | def2-SV(P)<br>6-31Gdp | def2-SV(P) | def2-TZVP<br>6-311Gdp |
|------------------|--------------|------------------------|-----------------------|------------|-----------------------|
| <b>Angle (°)</b> |              |                        |                       |            |                       |
| <b>Cnt-Y-Cnt</b> | <b>137.0</b> | 137.408                | 137.571               | 137.907    | 137.556               |
| <b>N-Y-O</b>     | <b>76.1</b>  | 76.056                 | 76.189                | 76.184     | 75.752                |
| <b>C-N-C</b>     | <b>117.4</b> | 119.039                | 119.055               | 119.520    | 119.011               |
| <b>MD</b>        |              | 0.647                  | 0.751                 | 1.017      | 0.586                 |
| <b>MSE</b>       |              | 0.946                  | 1.013                 | 1.760      | 1.010                 |
| <b>RMSE</b>      |              | 0.894                  | 1.027                 | 3.097      | 1.020                 |
| <b>MAPE</b>      |              | 0.522%                 | 0.625%                | 0.837%     | 0.418%                |

<sup>a</sup>Mean deviation (MD). <sup>b</sup>Mean square error (MSE). <sup>c</sup>Root mean square error (RMSE). <sup>d</sup>Mean absolute percentage error (MAPE). <sup>e</sup>Cnt = Cp\* ring centroid.

**Table S5.** Metrical parameters for (Cp\*<sub>2</sub>Y)<sub>2</sub>(μ-<sup>t</sup>Bu-salophen), **3**, calculated as a neutral singlet using the hybrid TPSSH functional with varying basis sets.

|                      | Exp        | def2-SV(P)<br>6-31+Gdp | def2-SV(P)<br>6-31Gdp | def2-SV(P) | def2-TZVP<br>6-311Gdp |
|----------------------|------------|------------------------|-----------------------|------------|-----------------------|
| <b>Distances (Å)</b> |            |                        |                       |            |                       |
| <b>Y1-Cp</b>         | 2.6844     | 2.6945                 | 2.6919                | 2.6942     | 2.6825                |
| <b>Y2-Cp</b>         | 2.6915     | 2.6945                 | 2.6919                | 2.6941     | 2.6825                |
| <b>Y1-O1</b>         | 2.1679(15) | 2.1940                 | 2.1950                | 2.1920     | 2.1900                |
| <b>Y2-O2</b>         | 2.1762(15) | 2.1940                 | 2.1950                | 2.1920     | 2.1900                |
| <b>Y1-N1</b>         | 2.4471(18) | 2.4350                 | 2.4340                | 2.4380     | 2.4360                |
| <b>Y2-N2</b>         | 2.4518(18) | 2.4350                 | 2.4340                | 2.4380     | 2.4360                |
| <b>O1-C21</b>        | 1.309(3)   | 1.3080                 | 1.3080                | 1.3000     | 1.3040                |
| <b>O2-C22</b>        | 1.308(3)   | 1.3080                 | 1.3080                | 1.3000     | 1.3040                |
| <b>N1-C24</b>        | 1.309(3)   | 1.3160                 | 1.3160                | 1.3140     | 1.3120                |
| <b>N2-C26</b>        | 1.301(3)   | 1.3160                 | 1.3160                | 1.3140     | 1.3120                |
| <b>N1-C23</b>        | 1.435(3)   | 1.4220                 | 1.4210                | 1.4170     | 1.4210                |
| <b>N2-C25</b>        | 1.433(3)   | 1.4210                 | 1.4210                | 1.4170     | 1.4210                |
| <b>C24-C52</b>       | 1.438(3)   | 1.4330                 | 1.4320                | 1.4340     | 1.4310                |
| <b>C26-C64</b>       | 1.432(3)   | 1.4330                 | 1.4320                | 1.4330     | 1.4310                |
| <b>MD</b>            |            | 0.0014                 | 0.0009                | -0.0005    | -0.0022               |
| <b>MSE</b>           |            | 0.0002                 | 0.0002                | 0.0002     | 0.0001                |
| <b>RMSE</b>          |            | 0.0124                 | 0.0128                | 0.0124     | 0.0110                |
| <b>MAPE</b>          |            | 0.066%                 | 0.038%                | 0.081%     | 0.131%                |

  

|                   | Exp   | def2-SV(P)<br>6-31+Gdp | def2-SV(P)<br>6-31Gdp | def2-SV(P) | def2-TZVP<br>6-311Gdp |
|-------------------|-------|------------------------|-----------------------|------------|-----------------------|
| <b>Angles (°)</b> |       |                        |                       |            |                       |
| <b>Cnt-Y-Cnt</b>  | 137.0 | 138.155                | 137.941               | 138.274    | 138.020               |
| <b>N-Y-O</b>      | 76.1  | 76.215                 | 76.279                | 76.238     | 75.958                |
| <b>C-N-C</b>      | 117.4 | 118.260                | 118.665               | 119.140    | 118.565               |
| <b>MD</b>         |       | 0.800                  | 0.878                 | 0.826      | 0.798                 |
| <b>MSE</b>        |       | 0.9704                 | 1.0945                | 1.0695     | 0.7606                |
| <b>RMSE</b>       |       | 0.985                  | 1.046                 | 1.034      | 0.872                 |
| <b>MAPE</b>       |       | 0.621%                 | 0.696%                | 0.660%     | 0.644%                |

<sup>a</sup>Mean deviation (MD). <sup>b</sup>Mean square error (MSE). <sup>c</sup>Root mean square error (RMSE). <sup>d</sup>Mean absolute percentage error (MAPE). <sup>e</sup>Cnt = Cp\* ring centroid.

**Table S6.** Metrical parameters for  $(\text{Cp}^*_2\text{Y})_2(\mu\text{-}^t\text{Bu}\text{-salophen})$ , **3**, calculated as a neutral singlet using the TPSSTPSS functional with varying basis sets.

|                      | Exp        | def2-SV(P)<br>6-31+Gdp | def2-SV(P)<br>6-31Gdp | def2-SV(P) | def2-TZVP<br>6-311Gdp |
|----------------------|------------|------------------------|-----------------------|------------|-----------------------|
| <b>Distances (Å)</b> |            |                        |                       |            |                       |
| <b>Y1-Cp</b>         | 2.6844     | 2.6998                 | 2.6976                | 2.6998     | 2.6884                |
| <b>Y2-Cp</b>         | 2.6915     | 2.6999                 | 2.6976                | 2.6999     | 2.6884                |
| <b>Y1-O1</b>         | 2.1679(15) | 2.1980                 | 2.1990                | 2.1970     | 2.1950                |
| <b>Y2-O2</b>         | 2.1762(15) | 2.1980                 | 2.1990                | 2.1960     | 2.1950                |
| <b>Y1-N1</b>         | 2.4471(18) | 2.4340                 | 2.4320                | 2.4380     | 2.4350                |
| <b>Y2-N2</b>         | 2.4518(18) | 2.4340                 | 2.4320                | 2.4380     | 2.4360                |
| <b>O1-C21</b>        | 1.309(3)   | 1.3140                 | 1.3140                | 1.3060     | 1.3100                |
| <b>O2-C22</b>        | 1.308(3)   | 1.3140                 | 1.3140                | 1.3060     | 1.3100                |
| <b>N1-C24</b>        | 1.309(3)   | 1.3230                 | 1.3230                | 1.3210     | 1.3190                |
| <b>N2-C26</b>        | 1.301(3)   | 1.3230                 | 1.3230                | 1.3210     | 1.3190                |
| <b>N1-C23</b>        | 1.435(3)   | 1.4250                 | 1.4240                | 1.4200     | 1.4240                |
| <b>N2-C25</b>        | 1.433(3)   | 1.4250                 | 1.4240                | 1.4200     | 1.4240                |
| <b>C24-C52</b>       | 1.438(3)   | 1.4350                 | 1.4340                | 1.4350     | 1.4320                |
| <b>C26-C64</b>       | 1.432(3)   | 1.4350                 | 1.4340                | 1.4350     | 1.4320                |
| <b>MD</b>            |            | 0.0053                 | 0.0045                | 0.0035     | 0.0017                |
| <b>MSE</b>           |            | 0.0002                 | 0.0002                | 0.0002     | 0.0002                |
| <b>RMSE</b>          |            | 0.0149                 | 0.0153                | 0.0141     | 0.0125                |
| <b>MAPE</b>          |            | 0.312%                 | 0.275%                | 0.166%     | 0.112%                |

  

|                   | Exp   | def2-SV(P)<br>6-31+Gdp | def2-SV(P)<br>6-31Gdp | def2-SV(P) | def2-TZVP<br>6-311Gdp |
|-------------------|-------|------------------------|-----------------------|------------|-----------------------|
| <b>Angles (°)</b> |       |                        |                       |            |                       |
| <b>Cnt-Y-Cnt</b>  | 137.0 | 138.140                | 137.924               | 138.235    | 137.988               |
| <b>N-Y-O</b>      | 76.1  | 76.464                 | 76.518                | 76.480     | 76.178                |
| <b>C-N-C</b>      | 117.4 | 118.616                | 118.604               | 119.071    | 118.528               |
| <b>MD</b>         |       | 0.887                  | 0.829                 | 1.075      | 0.711                 |
| <b>MSE</b>        |       | 0.947                  | 0.803                 | 1.461      | 0.738                 |
| <b>RMSE</b>       |       | 0.896                  | 0.645                 | 2.136      | 0.544                 |
| <b>MAPE</b>       |       | 0.759%                 | 0.727%                | 0.918%     | 0.572%                |

<sup>a</sup>Mean deviation (MD). <sup>b</sup>Mean square error (MSE). <sup>c</sup>Root mean square error (RMSE). <sup>d</sup>Mean absolute percentage error (MAPE). <sup>e</sup>Cnt = Cp\* ring centroid.

## 8 References

- 1 N. F. Chilton, R. P. Anderson, L. D. Turner, A. Soncini and K. S. Murray, PHI: a powerful new program for the analysis of anisotropic monomeric and exchange-coupled polynuclear *d*- and *f*-block complexes, *J. Comput. Chem.*, 2013, **34**, 1164–1175.
- 2 J. D. Rinehart, M. Fang, W. J. Evans and J. R. Long, Strong exchange and magnetic blocking in N<sub>2</sub><sup>3-</sup>-radical-bridged lanthanide complexes, *Nat. Chem.*, 2011, **3**, 538–542.
- 3 D. Errulat, B. Gabidullin, A. Mansikkamäki and M. Murugesu, Two heads are better than one: improving magnetic relaxation in the dysprosium metallocene upon dimerization by use of an exceptionally weakly-coordinating anion, *Chem. Commun.*, 2020, **56**, 5937–5940.
- 4 P. Evans, D. Reta, C. A. P. Goodwin, F. Ortu, N. F. Chilton and D. P. Mills, A double-dysprosocenium single-molecule magnet bound together with neutral ligands, *Chem. Commun.*, 2020, **56**, 5677–5680.
- 5 F. Tuna, C. A. Smith, M. Bodensteiner, L. Ungur, L. F. Chibotaru, E. J. L. McInnes, R. E. P. Winpenny, D. Collison and R. A. Layfield, A High Anisotropy Barrier in a Sulfur-Bridged Organodysprosium Single-Molecule Magnet, *Angew. Chem. Int. Ed.*, 2012, **51**, 6976–6980.
- 6 T. Pugh, N. F. Chilton and R. A. Layfield, Antimony-ligated dysprosium single-molecule magnets as catalysts for stibine dehydrocoupling, *Chem. Sci.*, 2017, **8**, 2073–2080.
- 7 F.-S. Guo and R. A. Layfield, Strong direct exchange coupling and single-molecule magnetism in indigo-bridged lanthanide dimers, *Chem. Commun.*, 2017, **53**, 3130–3133.
- 8 T. Pugh, V. Vieru, L. F. Chibotaru and R. A. Layfield, Magneto-structural correlations in arsenic- and selenium-ligated dysprosium single-molecule magnet, *Chem. Sci.*, 2016, **7**, 2128–2137.
- 9 T. Pugh, F. Tuna, L. Ungur, D. Collison, E. J. L. McInnes, L. F. Chibotaru and R. A. Layfield, Influencing the properties of dysprosium single-molecule magnets with phosphorus donor ligands, *Nat. Commun.*, 2015, **6**, 7492.
- 10 Y. Meng, J. Xiong, M. Yang, Y. Qiao, Z. Zhong, H. Sun, J. Han, T. Liu, B. Wang and S. Gao, Experimental Determination of Magnetic Anisotropy in Exchange-Bias Dysprosium Metallocene Single-Molecule Magnets, *Angew. Chem. Int. Ed.*, 2020, **59**, 13037–13043.
- 11 M. He, F.-S. Guo, J. Tang, A. Mansikkamäki and R. A. Layfield, Fulvalene as a platform for the synthesis of a dimetallic dysprosocenium single-molecule magnet, *Chem. Sci.*, 2020, **11**, 5745–5752.
- 12 A.-J. Hutchings, F. Habib, R. J. Holmberg, I. Korobkov and M. Murugesu, Structural Rearrangement Through Lanthanide Contraction in Dinuclear Complexes, *Inorg. Chem.*, 2014, **53**, 2102–2112.
- 13 J.-P. Costes, J. M. Clemente-Juan, F. Dahan, F. Nicodème and M. Verelst, Unprecedented Ferromagnetic Interaction in Homobinuclear Erbium and Gadolinium Complexes: Structural and Magnetic Studies, *Angew. Chem. Int. Ed.*, 2002, **41**, 323–325.

- 14 W.-M. Wang, M.-J. Wang, S.-S. Hao, Q.-Y. Shen, M.-L. Wang, Q.-L. Liu, X.-F. Guan, X.-T. Zhang and Z.-L. Wu, 'Windmill'-shaped Ln<sup>III</sup><sub>4</sub> (Ln<sup>III</sup> = Gd and Dy) clusters: magnetocaloric effect and single-molecule-magnet behavior, *New J. Chem.*, 2020, **44**, 4631–4638.
- 15 M. Li, H. Wu, Z. Xia, V. Montigaud, O. Cador, B. Le Guennic, H. Ke, W. Wang, G. Xie and S. Chen, Bromine-bridged Dy<sub>2</sub> single-molecule magnet: magnetic anisotropy driven by cis/trans stereoisomers, *Chem. Commun.*, 2019, **55**, 14661–14664.
- 16 F. Gao, L. Wang, G.-Z. Zhu, Y.-H. Liu, H. Yang, X. Li and K. Yang, Controllable syntheses and magnetic properties of novel homoleptic triple-decker lanthanide complexes, *Dalt. Trans.*, 2019, **48**, 13360–13368.
- 17 X. Yao, G. An, Y. Li, P. Yan, W. Li and G. Li, Effect of nuclearity and symmetry on the single-molecule magnets behavior of seven-coordinated β-diketonate Dy(III) complexes, *J. Solid State Chem.*, 2019, **274**, 295–302.
- 18 M. U. Anwar, A. Al-Harrasi, J. M. Rawson, E. L. Gavey, J. Regier, D. Alexandropoulos, M. Pilkington and L. K. Thompson, Slow magnetic relaxation in Dy<sub>2</sub> and Dy<sub>4</sub> complexes of a versatile, trifunctional polydentate N,O-ligand, *Dalt. Trans.*, 2019, **48**, 14269–14278.
